# Supplementary material for: A single carbon atom controls the geometry and reactivity of CoII(N2S2) complexes
Source: Royal Society of Chemistry journal article supplement (doi:10.1039/d3cc05394f), 2023-12-15
Supplement: d3cc05394f1.pdf [file d3cc05394f1.pdf]

# **A Single Carbon Atom Controls Geometry and Reactivity of Co<sup>II</sup>(N<sub>2</sub>S<sub>2</sub>) Complexes**

Manish Jana<sup>a</sup>, Manuel Quiroz <sup>a</sup>, and Prof. Marcetta Y. Darensbourg\*<sup>a</sup>

<sup>a</sup>*Department of Chemistry, Texas A&M University, College Station, Texas-77843, US.*

*Supporting Information*

**Methods and Materials.** All reactions and manipulations were performed either under inert atmosphere N<sub>2</sub> glove box or using standard Schlenk-line and syringe/rubber septa techniques under N<sub>2</sub> atmosphere. Dry solvents were purified and degassed via a Bruker solvent system. Reagents were purchased from commercial sources and used as received. The ligands<sup>1</sup> and the tungsten synthon [(pip)<sub>2</sub>W(CO)<sub>4</sub>]<sub>2</sub><sup>2</sup> were synthesized following the literature reported procedures.

**Physical measurements.** Solution infrared spectrum were recorded on a Bruker Tensor 37 Fourier transform IR (FTIR) spectrometer in CaF<sub>2</sub> solution cell with a 0.2 mm path length. <sup>1</sup>H NMR spectra was recorded using the Bruker Avance NEO 400 MHz system with an automated tuning 5mm broadband iProbe (Acend magnet). Atmospheric pressure chemical ionization mass spectrometry (APCI-MS) was performed by the Laboratory for Biological Mass Spectrometry at Texas A&M University. UV vis spectrum were recorded on a SHIMADZU UV-2450 UV-Vis spectrophotometer.

Single crystal X-ray diffraction measurements were carried out at a low temperature employing a (three circle or kappa) Bruker-AXS (Quest or Venture) with I $\mu$ S source and a Photon III area detector diffractometer for (Mo K $\alpha$  radiation,  $\lambda$  = 0.71073 Å or Cu K $\alpha$  radiation,  $\lambda$  = 1.54178 Å) (NSF-CHE-9807975, NSF-CHE-0079822 and NSF-CHE-0215838). For complex **1**, Rigaku synergy dual source (Cu K $\alpha$  radiation,  $\lambda$  = 1.54178 Å) with hybrid pixel array detector was used for data collection. Crystals (for color, habit, size see corresponding CIF files) were mounted on a nylon or Kapton® loops and cooled in a cold nitrogen stream (OXFORD Cryosystems (700 or 800), to 110(2) K. Bruker AXS APEX 3/4<sup>3</sup> software was used for data collection and reduction. Absorption corrections were applied using SADABS.<sup>4</sup> Space group assignments were determined by examination of systematic absences, E-statistics, and successive refinement of the structures. Structures were solved using SHELXT<sup>5</sup> and refined by least-squares refinement on F<sup>2</sup> followed by difference Fourier synthesis (OLEX2, SHELXL).<sup>6,7</sup> All hydrogen atoms were included in the final structure factor calculation at idealized positions and were allowed to ride on the neighbouring atoms with relative isotropic displacement coefficients. Thermal parameters were refined anisotropically for all non-hydrogen atoms to convergence. The MERCURY 2022.1.0<sup>8</sup> interface was used for structure visualization, analysis of bond distances and angles, and drawing ORTEP plots.

**Cyclic Voltammetry.** Cyclic voltammograms were recorded on a CHI600E electrochemical analyzer (HCH instruments, Inc.). All experiments were performed under Ar atmosphere in CH<sub>3</sub>CN solutions containing a 0.1 M [<sup>n</sup>Bu<sub>4</sub>N][PF<sub>6</sub>] electrolyte and 2.0 mM analyte at room temperature. A 0.071 cm<sup>2</sup> glassy carbon disk was used as the working electrode, platinum wire as the counter electrode, and Ag<sup>0</sup>/AgCl as the reference electrode. All potentials were referenced to the Fc<sup>+</sup>/Fc couple at 0.00 V.

### ***Synthesis of Complex 1***

2.1 g (0.0058 mmol) of H<sub>2</sub>-bme-dabz ligand is taken up in 15 mL of toluene and a suspension of 1.49 g (0.0058 mmol) anhydrous cobalt(II) acetylacetonate, Co(acac)<sub>2</sub> in toluene is added to it. The reaction is allowed to stir under inert atmosphere overnight and the color changes from dark purple to dark green with formation of solids. The crude solid is collected on a glass-fritted funnel under anaerobic conditions. The solid is washed thoroughly with toluene and hexane to remove the unreacted ligand. Yield: 2.0 g (41%). The green solid is found to be insoluble in most organic solvents. Crystals suitable for x-ray diffraction analysis can be obtained from layering a hot dimethyl formamide solution of the complex with hexane. UV-vis spectrum in DMF [ $\lambda_{\text{max}}$  (nm)]: 267, 286, 338, 369, 533, 631. *Anal.* Calcd. for C<sub>40</sub>H<sub>52</sub>Co<sub>2</sub>N<sub>4</sub>S<sub>4</sub>·(0.5·hexane): C, 58.82; H, 6.77; N, 6.38. Found: C, 58.74; H, 6.45; N, 6.41.

### ***Synthesis of Complex 2***

1.1 g (0.0028 mmol) of H<sub>2</sub>dadt<sup>Bz</sup> ligand is taken up in 15 mL of toluene and a suspension of 0.69 g (0.0026 mmol) anhydrous cobalt(II) acetylacetonate, Co(acac)<sub>2</sub> in toluene is added to it. The ligand is taken in slight excess as it is readily soluble in ether or toluene and can be removed by washing with ether or toluene. The reaction is allowed to stir under inert atmosphere overnight and the color changes from dark purple to dark blue with formation of solids. The crude solid is collected on a glass-fritted funnel under anaerobic conditions. The solid is washed thoroughly with toluene and ether to remove the unreacted ligand. Yield: 0.8 g (66 %). Crystals suitable for x-ray diffraction analysis can be obtained by layering a concentrated solution of DCM with hexane. UV-vis spectrum in DMF [ $\lambda_{\text{max}}$  (nm)]: 267, 303, 368, 405, 545, 625, 664. *Anal.* Calcd. for C<sub>21</sub>H<sub>28</sub>N<sub>2</sub>CoS<sub>2</sub>: C, 58.45; H, 6.54; N, 6.49. Found: C, 58.44; H, 6.67; N, 6.51.

### ***Synthesis of Complex 3***

In a 40 mL vial, 92.8 mg (0.2 mmol) of (pip)<sub>2</sub>W(CO)<sub>4</sub> and 83.4 mg (0.1 mmol) of complex 1 ([Co(bme-dabz)]<sub>2</sub>) were dissolved in 5.0 mL of DMF. The mixture was stirred at 80°C for 2 h. The color of the solution became dark brown. The vial was allowed to cool down to room temperature, and the addition of 20 mL of diethyl ether led to a precipitate formation over the course of a few hours. The resulting mixture was anaerobically filtered, and the solid was dried in vacuo to produce 60 mg (76%, based on amount of complex 1) of a brown solid. The solid was dissolved in concentrated DMF solution, filtered and ether was allowed to diffuse into the DMF solution for 3-4 days at room temperature to obtain needle shaped X-ray-quality crystals. UV-vis spectrum in DMF [ $\lambda_{\text{max}}$  (nm)]: 269, 296, 384, 449, 519, 595. IR (DMF):  $\nu(\text{CO})$  (cm<sup>-1</sup>) 1991 (m), 1872 (s), 1835 (s) and 1816 (s) (in DMF); 1995 (m), 1877(s), 1840(s) and 1819(s) (in MeCN); 1988(m), 1864(s), 1833(s) and 1791(s) (in ATR). *Anal.* Calcd. for C<sub>27</sub>H<sub>33</sub>CoN<sub>3</sub>O<sub>5</sub>S<sub>2</sub>W·(0.5 Et<sub>2</sub>O): C, 42.3; H, 4.65; N, 5.1. Found: C, 42.20; H, 4.85; N, 5.63.

## Synthesis of Complex 4

In a 40 mL vial, 92.8 mg (0.2 mmol) of  $(\text{pip})_2\text{W}(\text{CO})_4$  and 86.22 mg (0.2 mmol) of complex **2** ( $[\text{Co}(\text{dadt}^{\text{Bz}})]$ ) were dissolved in 5.0 mL of DMF. The mixture was stirred at 80°C for 2 h. The colour of the solution became dark green. The vial was allowed to cool down to room temperature, and the addition of 20 mL of diethyl ether led to a precipitate that was formed over the course of a few hours. The resulting mixture was anaerobically filtered, and the solid was dried in vacuo to produce 73 mg (24%, based on amount of Complex **2**) of a green solid. The solid was dissolved in concentrated DMF solution, filtered and ether was allowed to diffuse into the DMF solution over 3-4 days at room temperature to obtain block shaped X-ray-quality crystals. UV-vis spectrum in DMF [ $\lambda_{\text{max}}$  (nm)]: 268, 296, 419, 550, 602. IR:  $\nu(\text{CO})$  ( $\text{cm}^{-1}$ ) 1885 and 1785 (in DMF); 1870, 1777 and 1742 (in ATR). *Anal.* Calcd. for  $\text{C}_{54}\text{H}_{70}\text{Co}_2\text{N}_6\text{O}_8\text{S}_4\text{W}_2$ : C, 41.98; H, 4.57; N, 5.44. Found: C, 42.29; H, 4.72; N, 5.35.

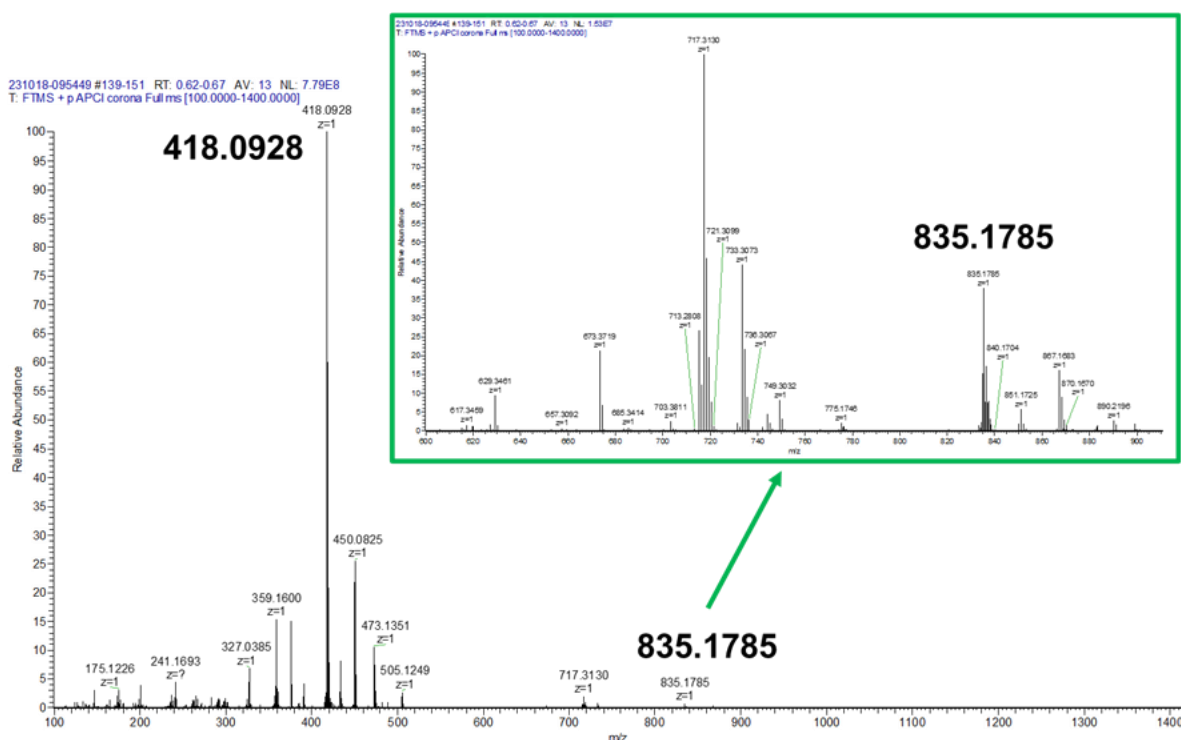

**Figure S1.** APCI-MS for complex **1** in DMF/MeCN mixture. The strong peak at  $m/z = 418.0928$  is for the monomeric form of complex **1**.

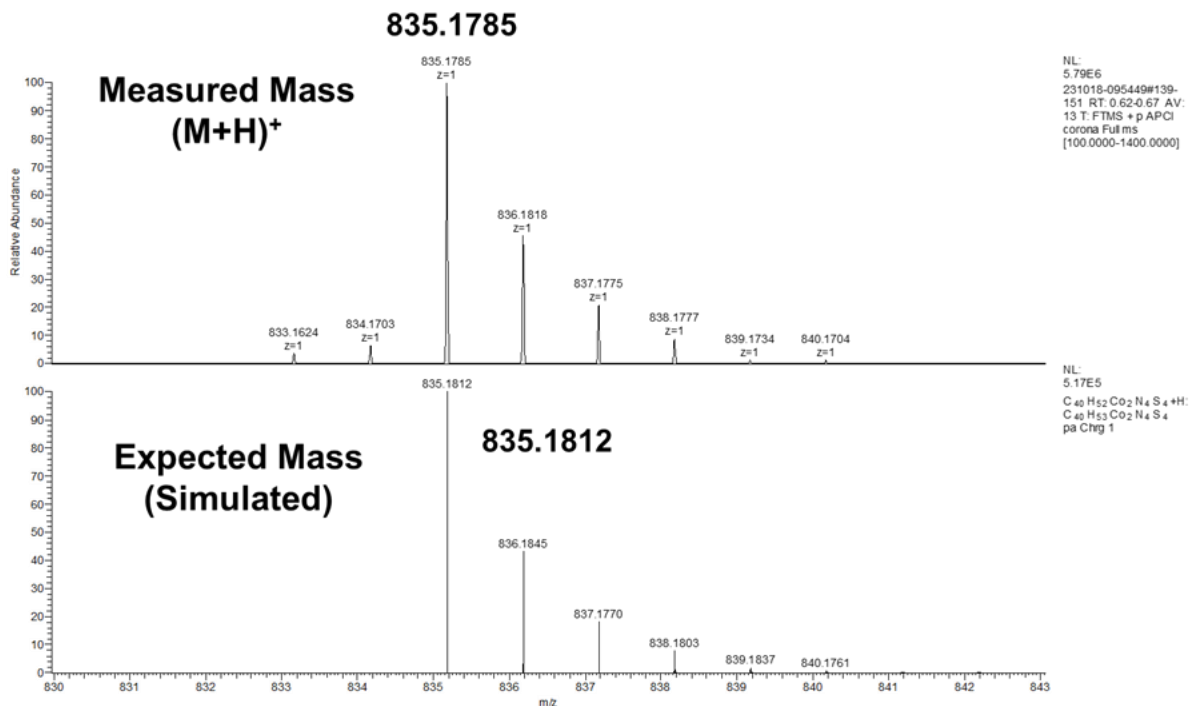

**Figure S2.** Isotopic bundles for complex 1 (measured mass) showing exact match with the expected mass in DMF/MeCN mixture.

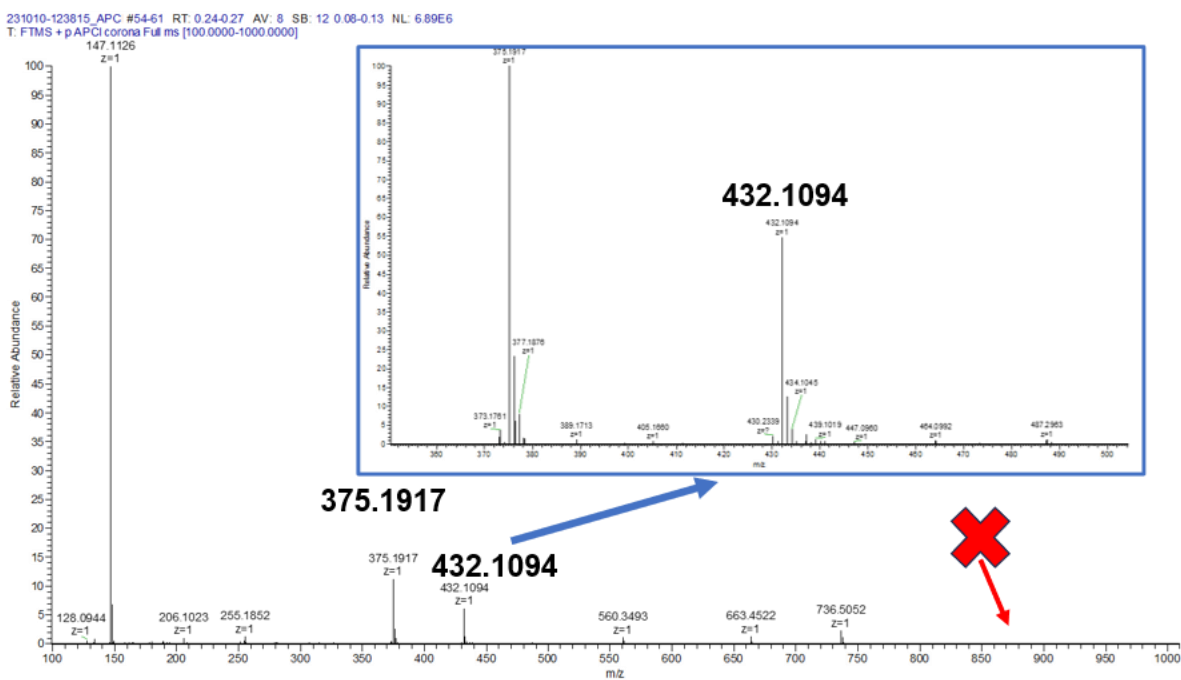

**Figure S3.** APCI-MS for complex 2 in DCM. No dimeric complex was indicated in the mass spectrum for complex 2 ( $m/z = 862.2052$ ).

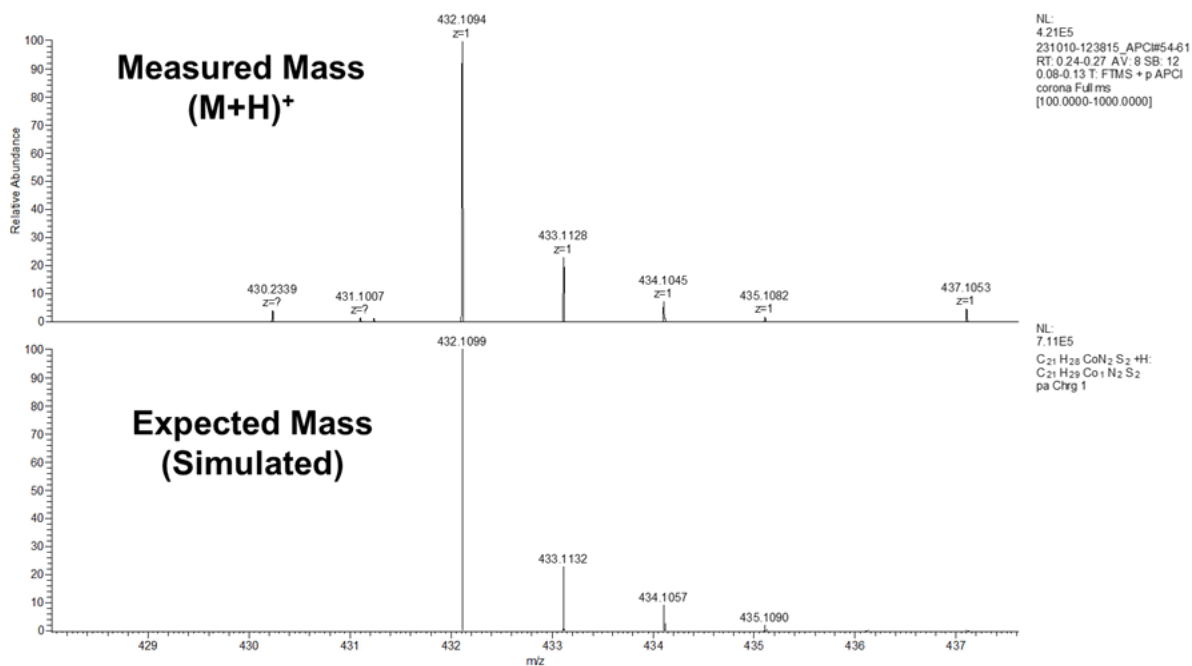

**Figure S4.** Isotopic bundles for complex **2** (measured mass) showing exact match with the expected mass in DCM.

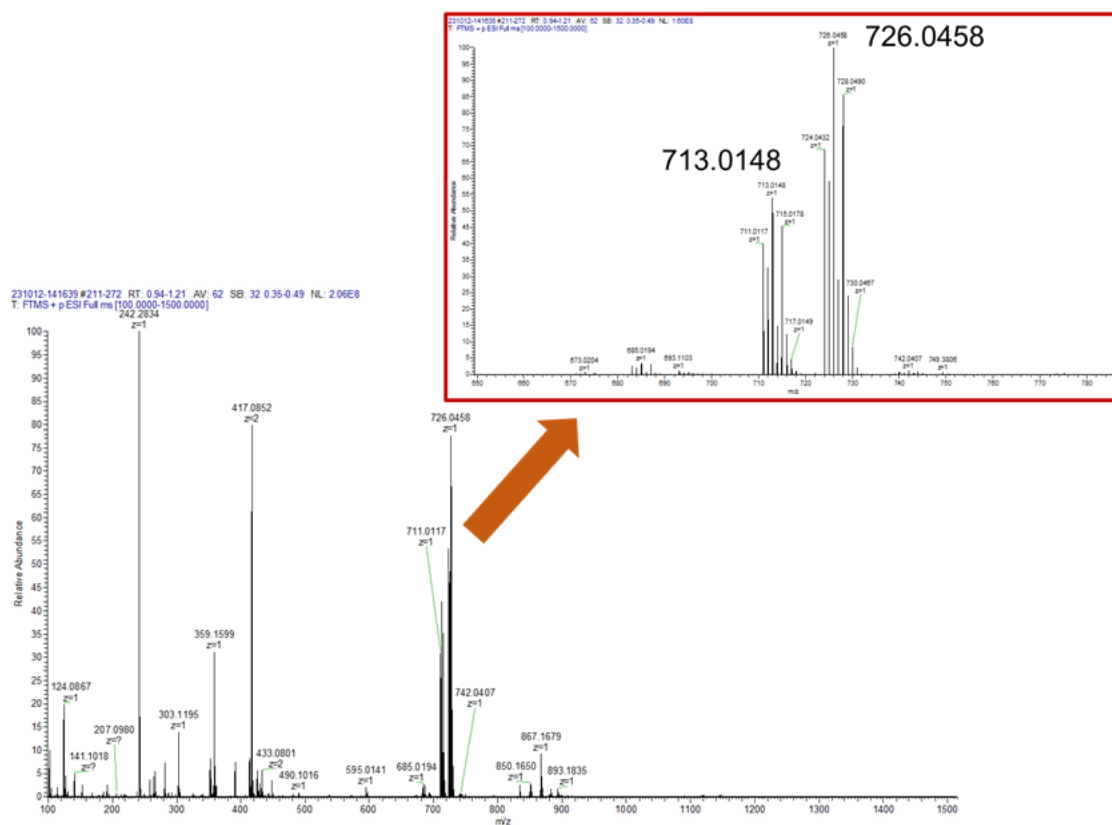

**Figure S5.** ESI-MS for complex **3** in DMF/MeCN mixture. The peak at  $m/z = 713.0148$  corresponds to the  $[M-(DMF)]^+$  species.

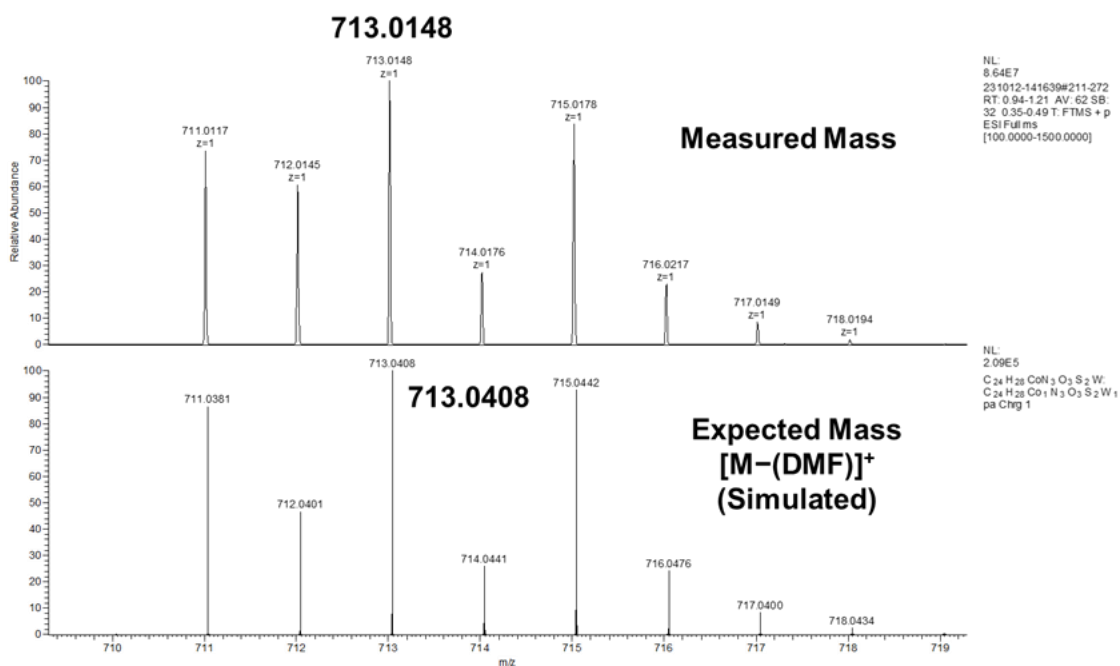

**Figure S6.** Isotopic bundles for complex **3** (measured mass) showing exact match with the  $[M-(DMF)]^+$  species in solution.

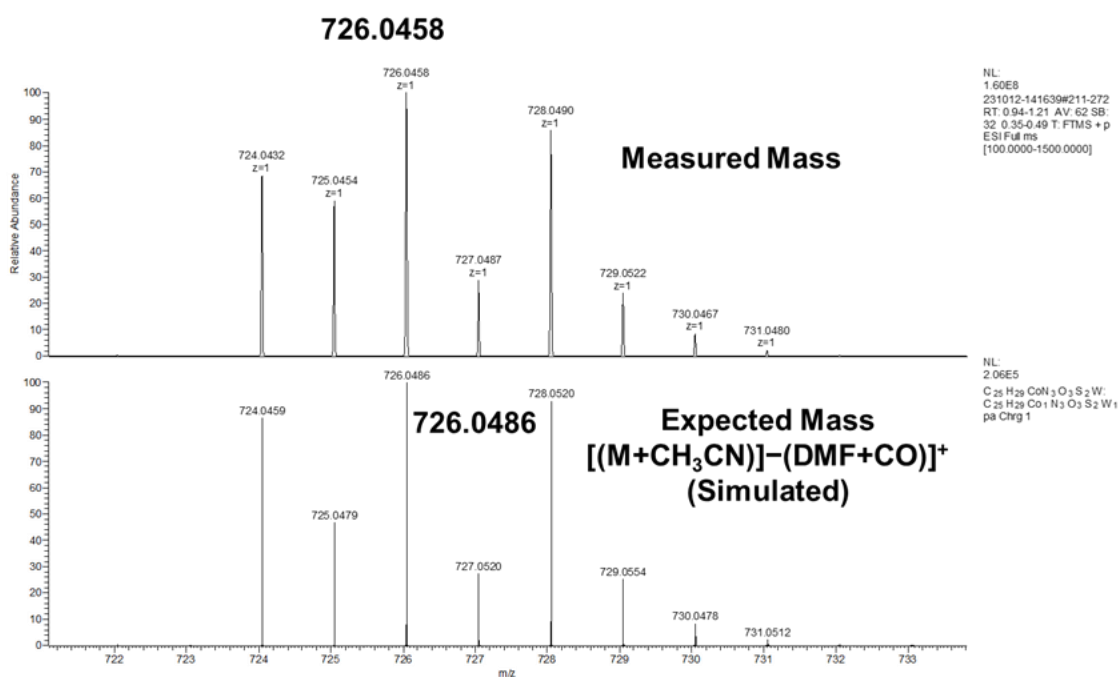

**Figure S7.** Isotopic bundles for complex **3** (measured mass) showing exact match with the  $[(M+CH_3CN)-(DMF+CO)]^+$  species in solution.

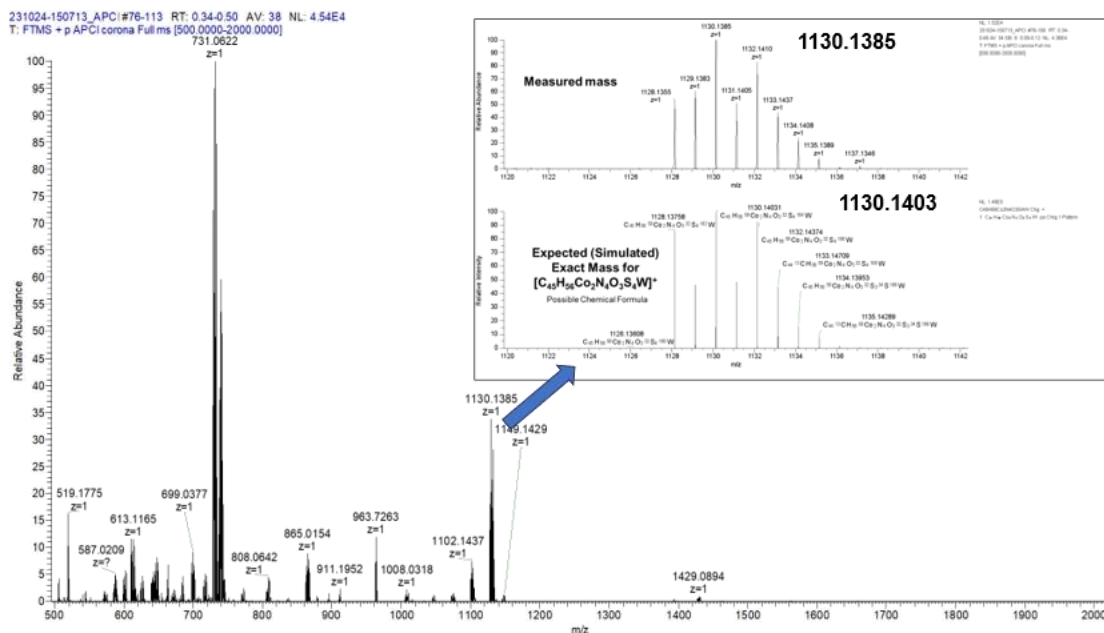

**Figure S8.** APCI-MS for complex **4** in DMF/MeCN mixture. The peak at  $m/z = 1130.1403$  corresponds to the  $[M-\{(W(CO)_3)+2\cdot(DMF)\}]^+$  species.

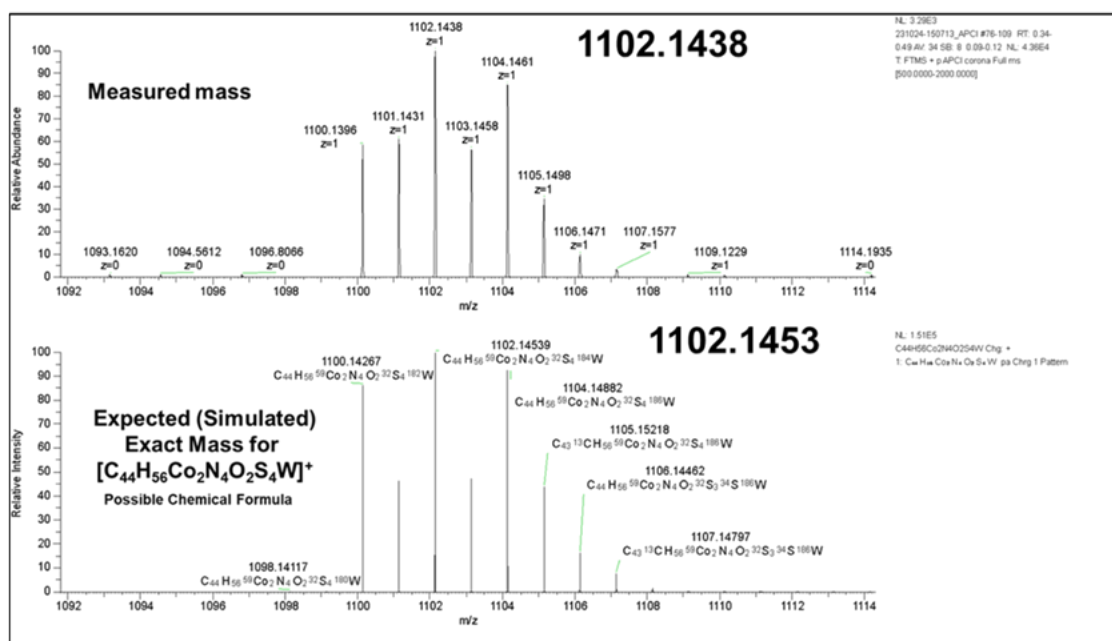

**Figure S9.** Isotopic bundle for the peak at  $m/z = 1102.1438$  corresponds to the  $[M-\{(W(CO)_3)+2\cdot(DMF)+CO\}]^+$  species.



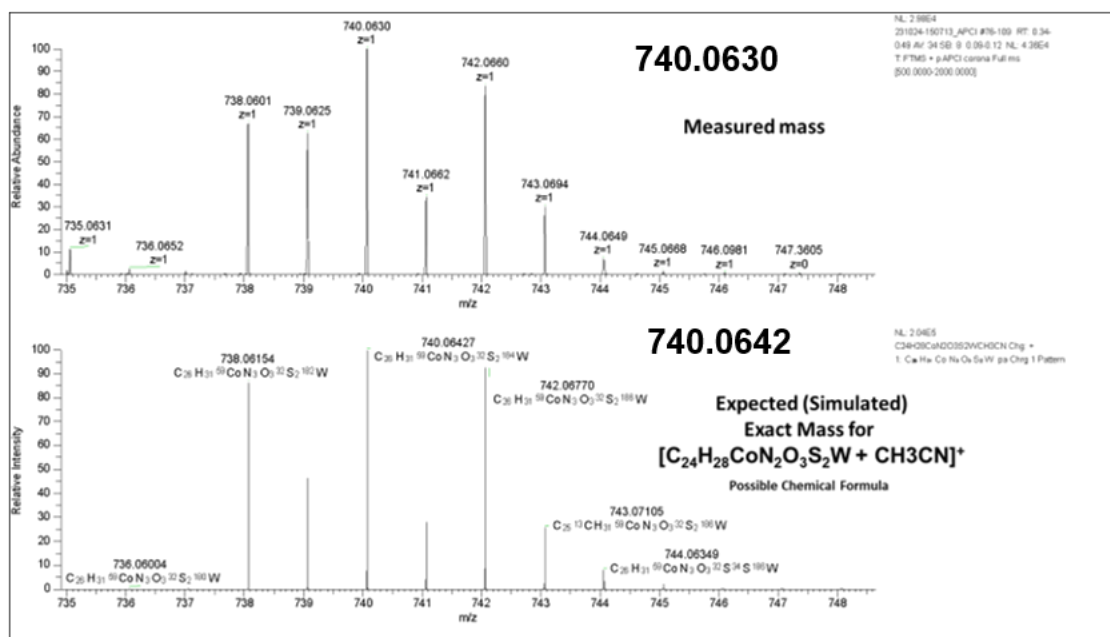

**Figure S10.** Isotopic bundle for the peak at  $m/z = 740.0630$  corresponds to the  $[(M+MeCN)-\{(Co(N_2S_2)W(CO)_3)+2\cdot(DMF)\}]^+$  species.

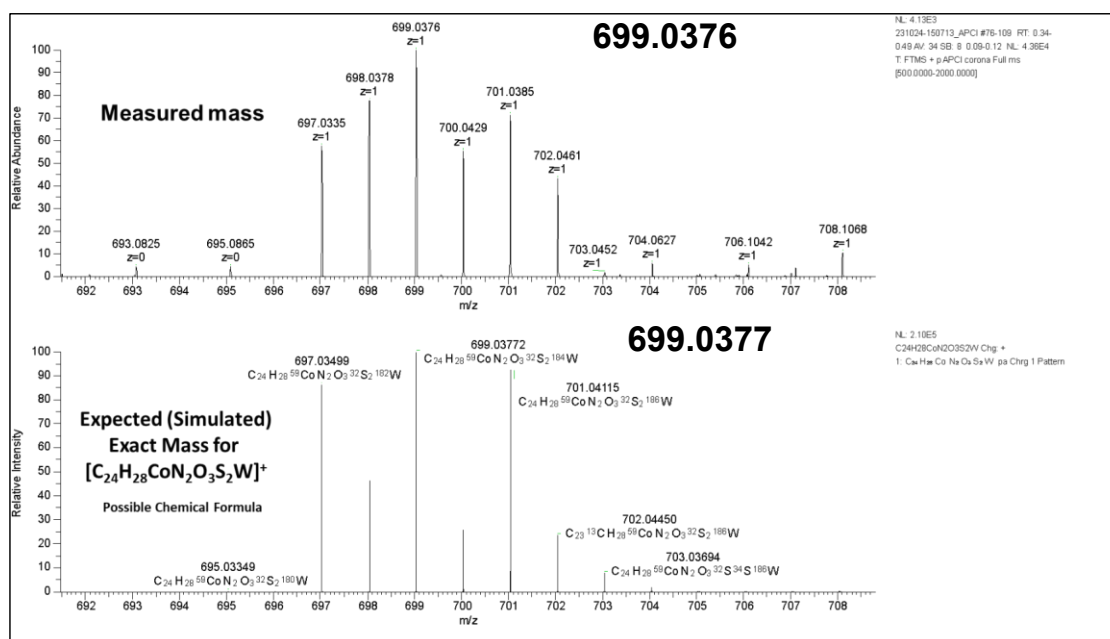

**Figure S11.** Isotopic bundle for the peak at  $m/z = 699.0376$  corresponds to the  $[(M)-\{(Co(N_2S_2)W(CO)_3)+2\cdot(DMF)\}]^+$  species.

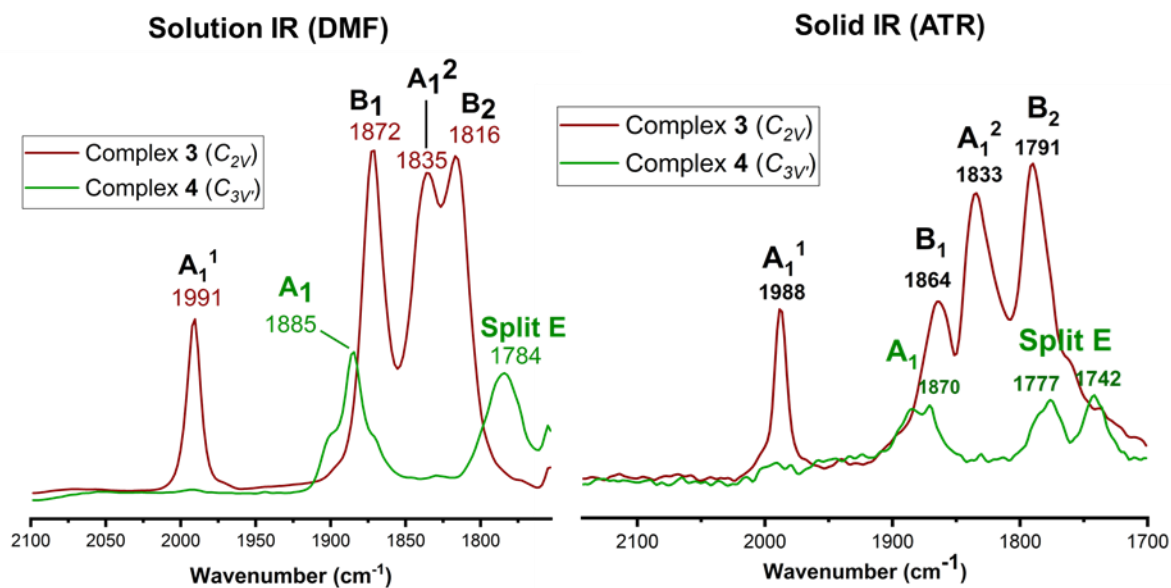

**Figure S12.**  $\nu(\text{CO})$  solution (DMF) and solid (ATR) IR spectra of complexes **3** and **4**; assignments according to their symmetries from XRD analysis.

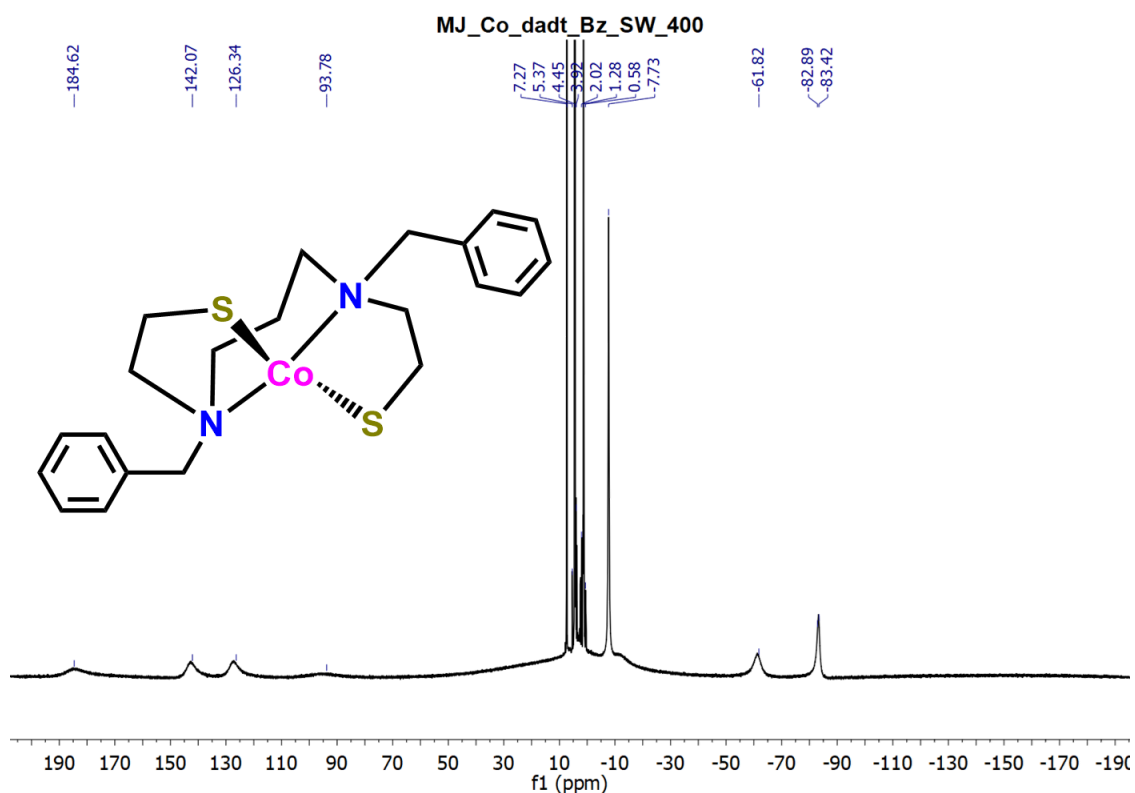

**Figure S13:**  $^1\text{H}$  NMR of Complex **2** ( $\text{Co\_dadt}^{\text{Bz}}$ ) at 295 K using a 400 MHz NMR.

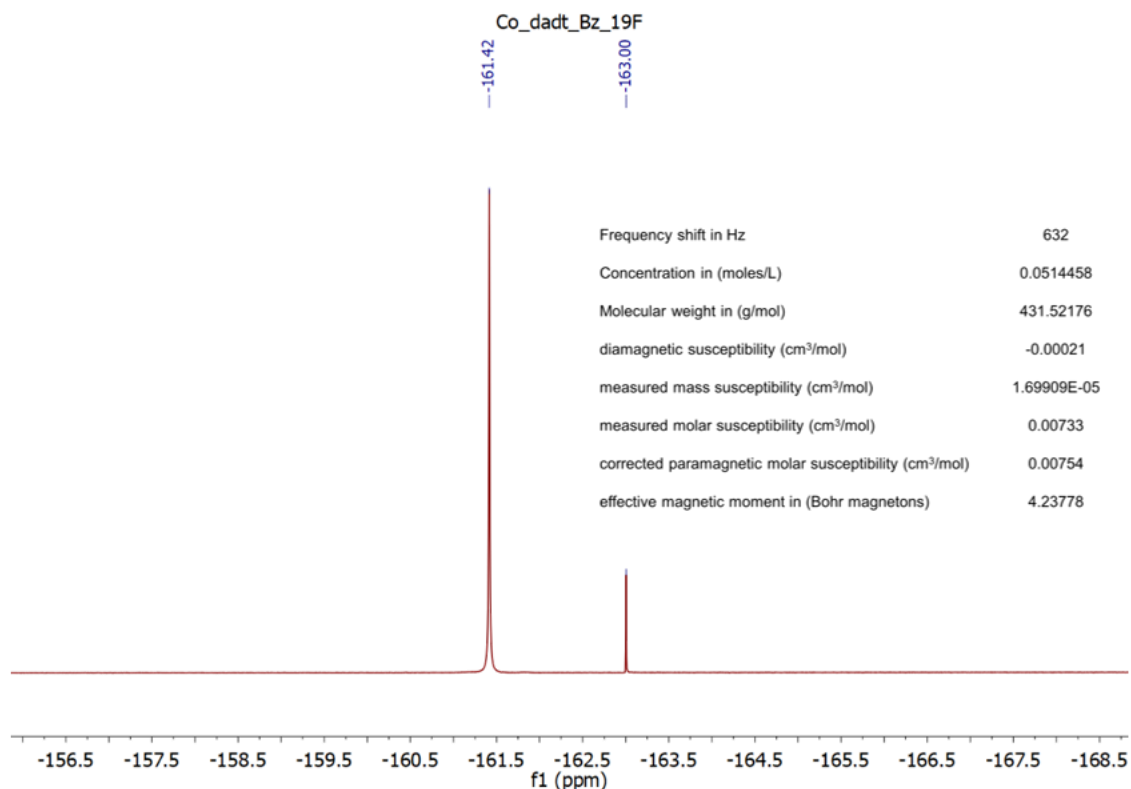

**Figure S14:** <sup>19</sup>F NMR of Complex **2** (Co(dadt<sup>Bz</sup>)) at 295 K in CDCl<sub>3</sub> using a 400 MHz NMR under argon for Evans Method determination of magnetic susceptibility.

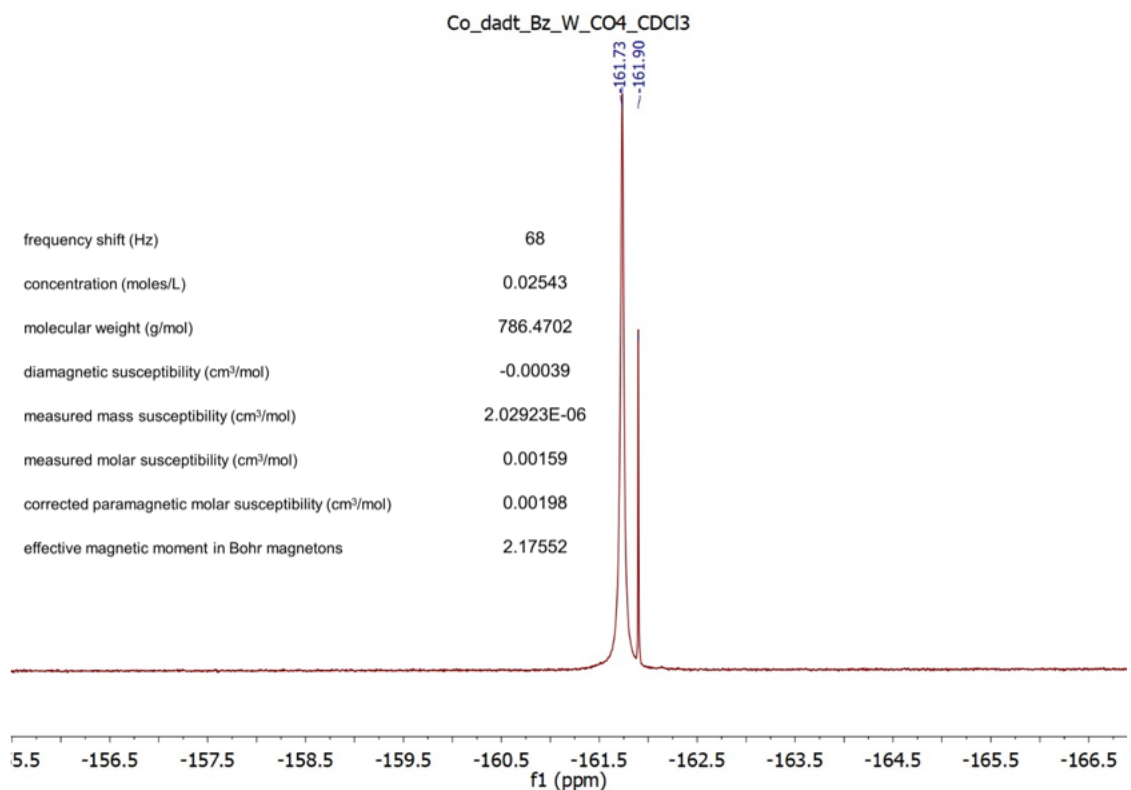

**Figure S15:** <sup>19</sup>F NMR of Complex **3** {Co(bme-dabz)•W(CO)<sub>4</sub>} at 295 K in CDCl<sub>3</sub> using a 400 MHz NMR under argon for Evans Method determination of magnetic susceptibility.

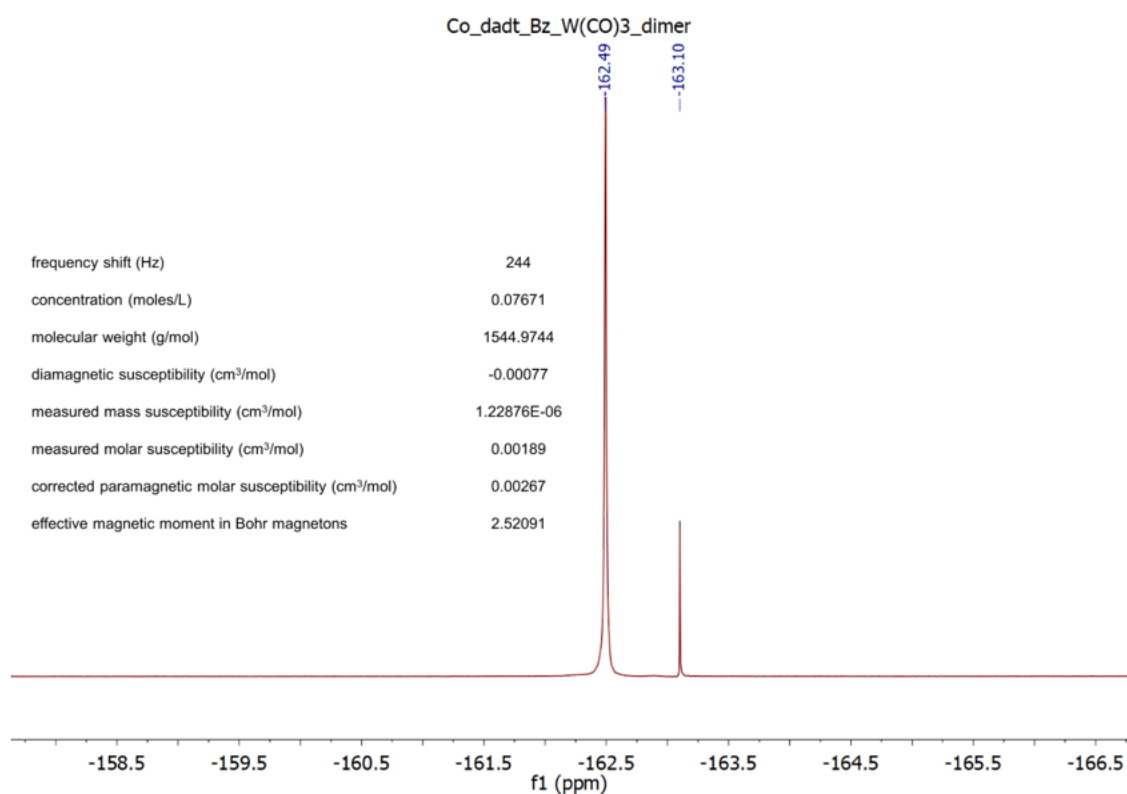

**Figure S16:** <sup>19</sup>F NMR of Complex 4, [Co(dadt<sup>Bz</sup>)•W(CO)<sub>3</sub>]<sub>2</sub> at 295 K in DMSO-d<sub>6</sub> using a 400 MHz NMR under argon for Evans Method determination of magnetic susceptibility.

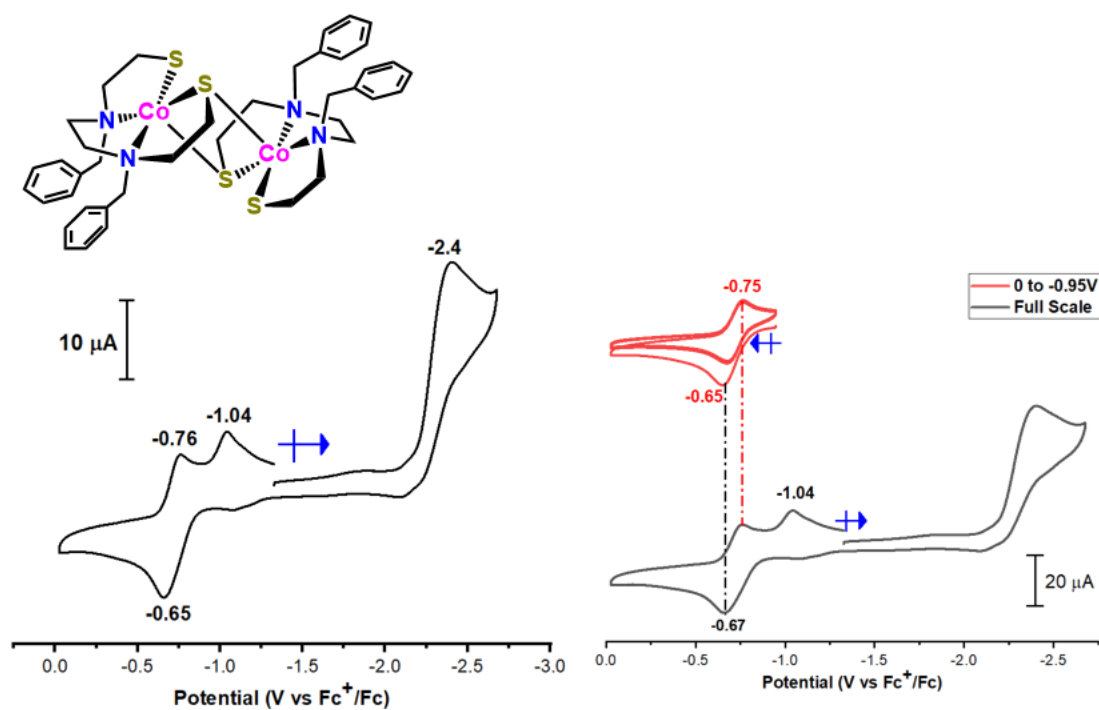

**Figure S17.** Cyclic voltammograms of 1 mM DMF solutions of Complex 1, recorded at a scan rate of 100 mV/s. Arrows indicate initial sweep direction.

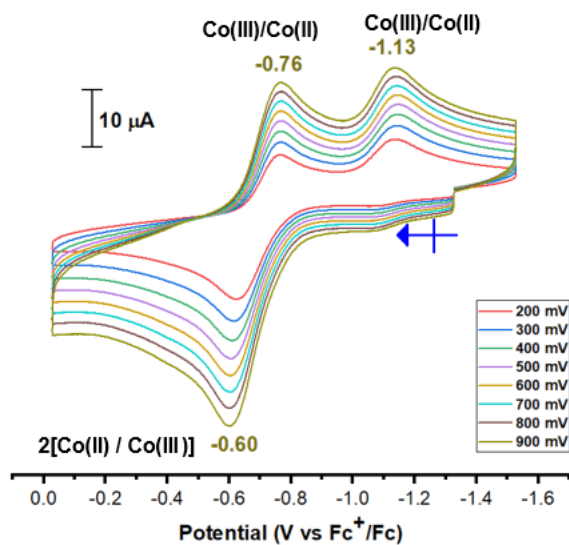

**Figure S18:** Scan rate dependence (200 – 900 mV/s) of Complex 1 in a 1 mM DMF solution. Arrows indicate initial sweep direction.

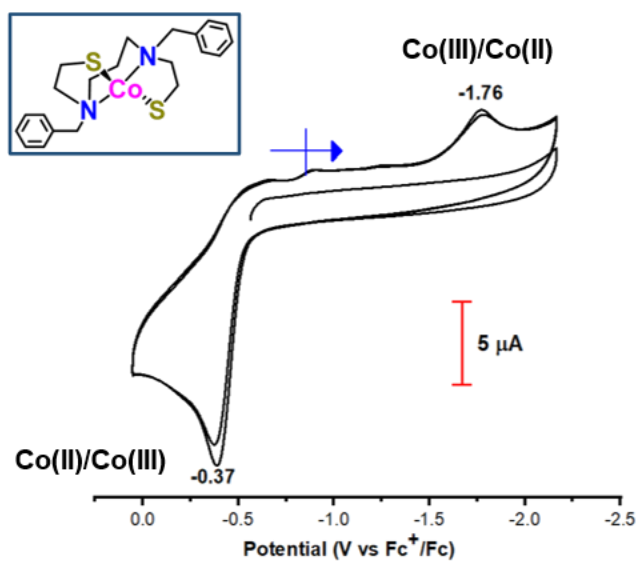

**Figure S19.** Cyclic voltammograms of 1 mM DMF solutions of Complex 2, recorded at a scan rate of 100 mV/s. Arrows indicate initial sweep direction.

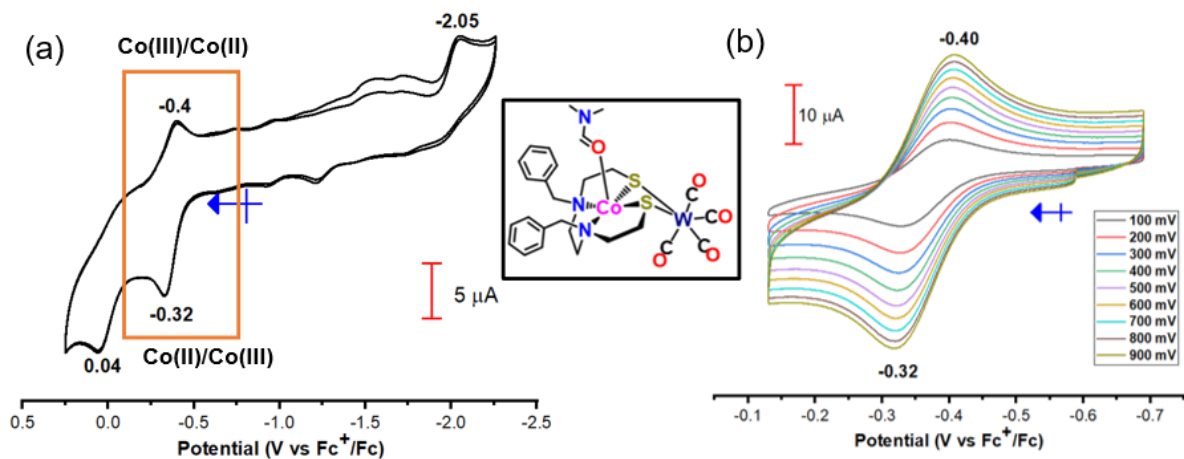

**Figure S20.** (a) Cyclic voltammograms of 1 mM DMF solutions of Complex 3, recorded at a scan rate of 100 mV/s. (b) The reversible oxidation event taken at different scan speed in DMF. Arrows indicate initial sweep direction.

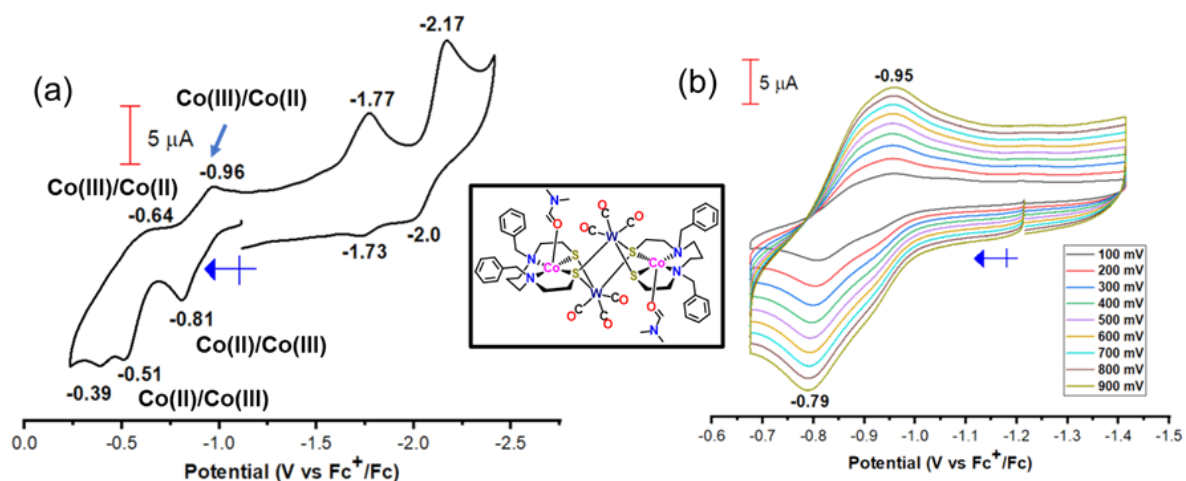

**Figure S21.** (a) Cyclic voltammograms of 1 mM DMF solutions of Complex 4, recorded at a scan rate of 100 mV/s. (b) The quasi-reversible oxidation event around  $-0.8$  V taken at different scan speed in DMF. Arrows indicate initial sweep direction.

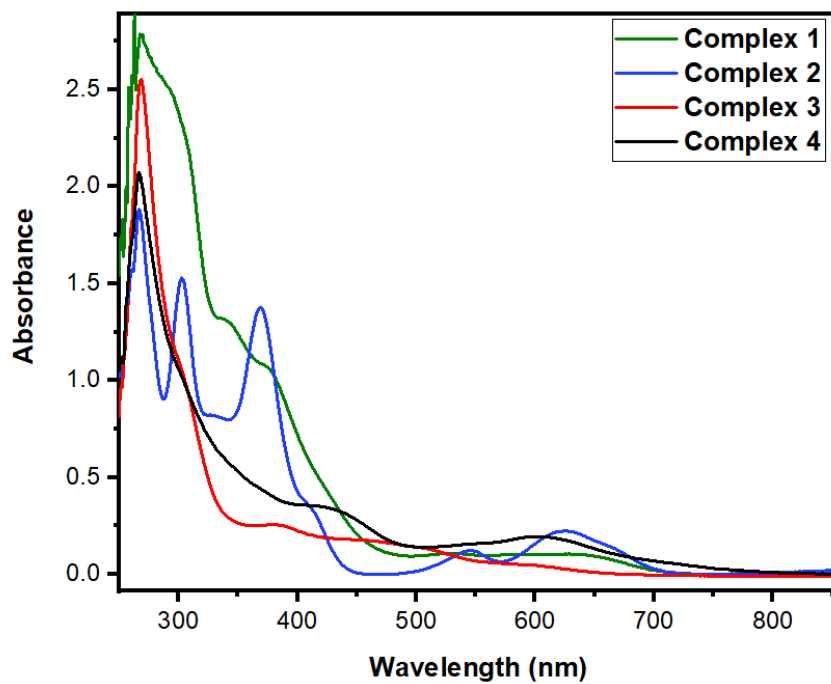

**Figure S22:** UV Vis spectra of all the complexes in DMF.

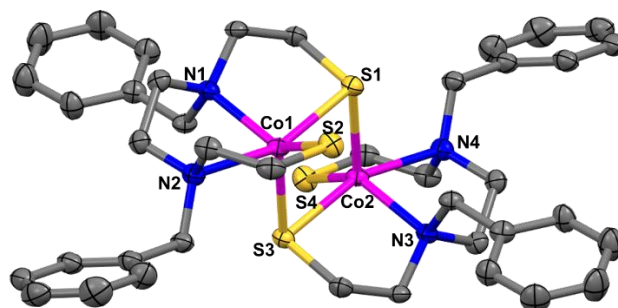

**Table S1.** Crystal data and structure refinement for Complex **1** (Co\_bme\_dabz).

|                                                              |                                                                               |
|--------------------------------------------------------------|-------------------------------------------------------------------------------|
| CCDC Number                                                  | <b>2302282</b>                                                                |
| Empirical formula                                            | C <sub>40</sub> H <sub>52</sub> Co <sub>2</sub> N <sub>4</sub> S <sub>4</sub> |
| Formula weight                                               | 834.95                                                                        |
| Temperature/K                                                | 100.01(12)                                                                    |
| Crystal system                                               | monoclinic                                                                    |
| Space group                                                  | <i>I</i> 2/ <i>a</i>                                                          |
| <i>a</i> /Å                                                  | 17.8761(3)                                                                    |
| <i>b</i> /Å                                                  | 13.6323(3)                                                                    |
| <i>c</i> /Å                                                  | 15.8821(3)                                                                    |
| $\alpha$ /°                                                  | 90                                                                            |
| $\beta$ /°                                                   | 102.083(2)                                                                    |
| $\gamma$ /°                                                  | 90                                                                            |
| Volume/Å <sup>3</sup>                                        | 3784.60(13)                                                                   |
| <i>Z</i>                                                     | 4                                                                             |
| $\rho_{\text{calc}}$ /cm <sup>3</sup>                        | 1.465                                                                         |
| $\mu$ /mm <sup>-1</sup>                                      | 9.195                                                                         |
| F(000)                                                       | 1752.0                                                                        |
| Crystal size/mm <sup>3</sup>                                 | 0.081 × 0.03 × 0.025                                                          |
| Radiation                                                    | Cu K $\alpha$ ( $\lambda$ = 1.54184)                                          |
| 2 $\Theta$ range for data collection/°                       | 8.226 to 140.15                                                               |
| Index ranges                                                 | -20 ≤ <i>h</i> ≤ 21, -16 ≤ <i>k</i> ≤ 16, -19 ≤ <i>l</i> ≤ 19                 |
| Reflections collected                                        | 31776                                                                         |
| Independent reflections                                      | 3587 [ <i>R</i> <sub>int</sub> = 0.0821, <i>R</i> <sub>sigma</sub> = 0.0326]  |
| Data/restraints/parameters                                   | 3587/0/226                                                                    |
| Goodness-of-fit on F <sup>2</sup>                            | 1.076                                                                         |
| Final <i>R</i> indexes [ <i>I</i> ≥ 2 $\sigma$ ( <i>I</i> )] | <i>R</i> <sub>1</sub> = 0.0435, <i>wR</i> <sub>2</sub> = 0.0950               |
| Final <i>R</i> indexes [all data]                            | <i>R</i> <sub>1</sub> = 0.0518, <i>wR</i> <sub>2</sub> = 0.0988               |
| Largest diff. peak/hole / e Å <sup>-3</sup>                  | 0.42/-0.41                                                                    |



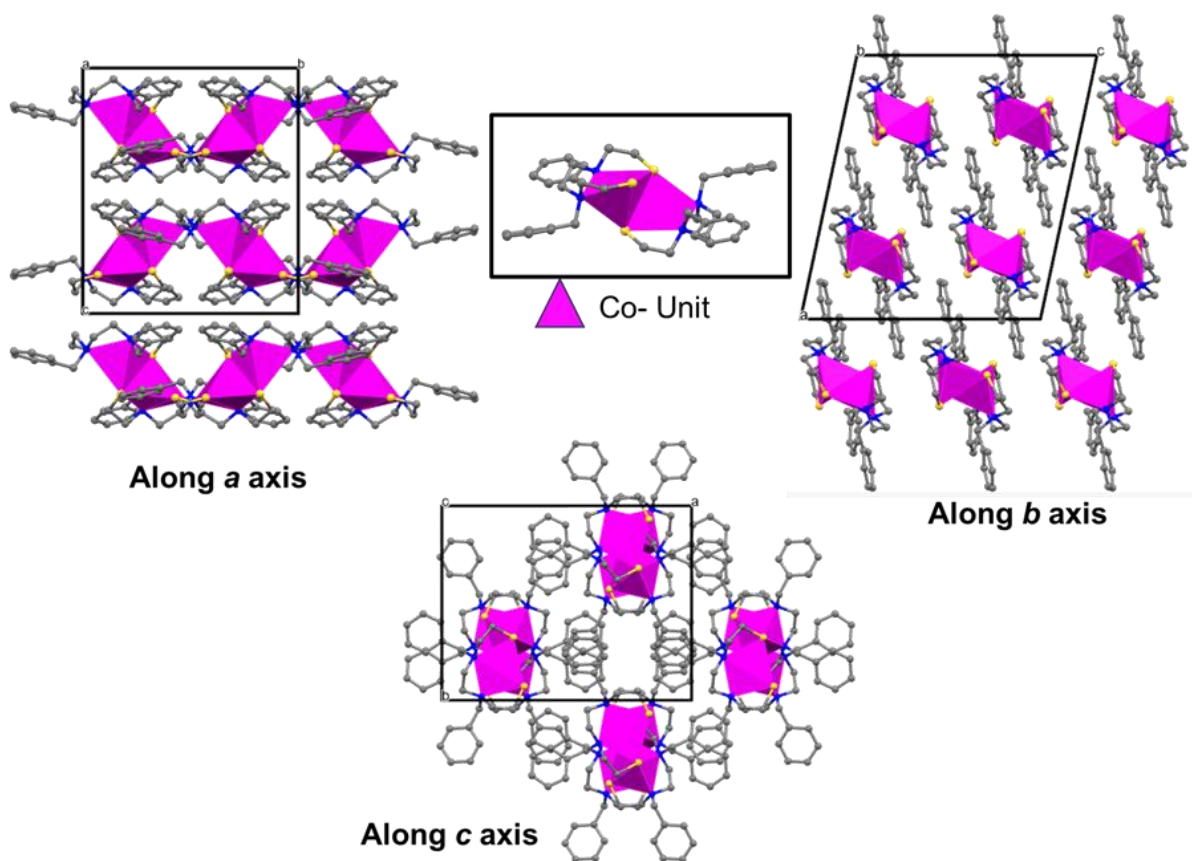

**Figure S23.** Crystal packing diagram of Complex 1 viewed along *a*, *b*, and *c* axis.

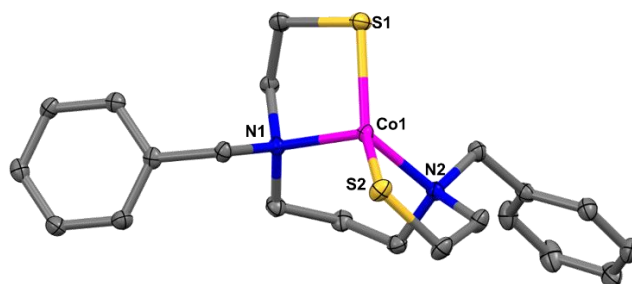

**Table S2.** Crystal data and structure refinement for Complex **2** (Co\_dadt<sup>Bz</sup>).

|                                             |                                                                 |
|---------------------------------------------|-----------------------------------------------------------------|
| CCDC Number                                 | <b>2258956</b>                                                  |
| Empirical formula                           | C <sub>21</sub> H <sub>28</sub> CoN <sub>2</sub> S <sub>2</sub> |
| Formula weight                              | 431.50                                                          |
| Temperature/K                               | 110.00                                                          |
| Crystal system                              | orthorhombic                                                    |
| Space group                                 | <i>Pbca</i>                                                     |
| a/Å                                         | 15.9232(10)                                                     |
| b/Å                                         | 15.0712(11)                                                     |
| c/Å                                         | 16.8379(11)                                                     |
| α/°                                         | 90                                                              |
| β/°                                         | 90                                                              |
| γ/°                                         | 90                                                              |
| Volume/Å <sup>3</sup>                       | 4040.8(5)                                                       |
| Z                                           | 8                                                               |
| ρ <sub>calc</sub> /cm <sup>3</sup>          | 1.419                                                           |
| μ/mm <sup>-1</sup>                          | 1.064                                                           |
| F(000)                                      | 1816.0                                                          |
| Crystal size/mm <sup>3</sup>                | 0.5 × 0.5 × 0.3                                                 |
| Radiation                                   | MoKα (λ = 0.71073)                                              |
| 2θ range for data collection/°              | 5.116 to 50.406                                                 |
| Index ranges                                | -18 ≤ h ≤ 19, -18 ≤ k ≤ 18, -20 ≤ l ≤ 20                        |
| Reflections collected                       | 80281                                                           |
| Independent reflections                     | 3627 [R <sub>int</sub> = 0.0780, R <sub>sigma</sub> = 0.0238]   |
| Data/restraints/parameters                  | 3627/0/235                                                      |
| Goodness-of-fit on F <sup>2</sup>           | 1.161                                                           |
| Final R indexes [I ≥ 2σ (I)]                | R <sub>1</sub> = 0.0291, wR <sub>2</sub> = 0.0619               |
| Final R indexes [all data]                  | R <sub>1</sub> = 0.0486, wR <sub>2</sub> = 0.0741               |
| Largest diff. peak/hole / e Å <sup>-3</sup> | 0.39/-0.34                                                      |

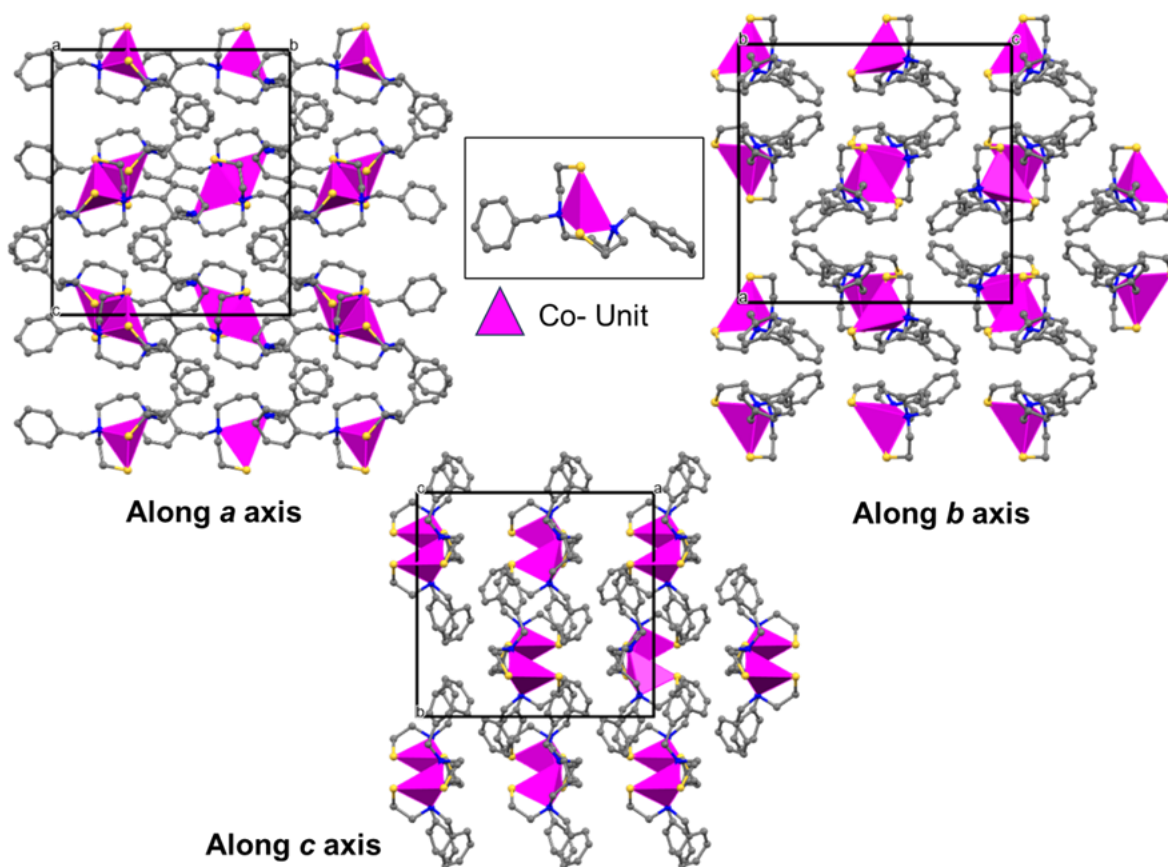

**Figure S24.** Crystal packing diagram of Complex 2 viewed along *a*, *b*, and *c* axis.

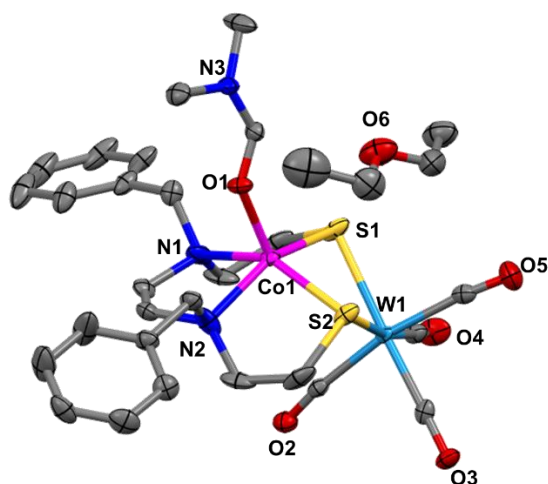

**Table S3.** Crystal data and structure refinement for Complex **3** (Co-bme-dabz•W(CO)<sub>4</sub>).

|                                                              |                                                                                  |
|--------------------------------------------------------------|----------------------------------------------------------------------------------|
| CCDC Number                                                  | <b>2302283</b>                                                                   |
| Empirical formula                                            | C <sub>31</sub> H <sub>43</sub> CoN <sub>3</sub> O <sub>6</sub> S <sub>2</sub> W |
| Formula weight                                               | 860.58                                                                           |
| Temperature/K                                                | 110.00                                                                           |
| Crystal system                                               | monoclinic                                                                       |
| Space group                                                  | <i>P2<sub>1</sub>/c</i>                                                          |
| <i>a</i> /Å                                                  | 13.2062(12)                                                                      |
| <i>b</i> /Å                                                  | 14.5330(13)                                                                      |
| <i>c</i> /Å                                                  | 18.5933(17)                                                                      |
| $\alpha$ /°                                                  | 90                                                                               |
| $\beta$ /°                                                   | 105.716(2)                                                                       |
| $\gamma$ /°                                                  | 90                                                                               |
| Volume/Å <sup>3</sup>                                        | 3435.1(5)                                                                        |
| <i>Z</i>                                                     | 4                                                                                |
| $\rho_{\text{calc}}$ /cm <sup>3</sup>                        | 1.664                                                                            |
| $\mu$ /mm <sup>-1</sup>                                      | 3.995                                                                            |
| <i>F</i> (000)                                               | 1724.0                                                                           |
| Crystal size/mm <sup>3</sup>                                 | 0.5 × 0.3 × 0.2                                                                  |
| Radiation                                                    | MoK $\alpha$ ( $\lambda$ = 0.71073)                                              |
| 2 $\Theta$ range for data collection/°                       | 4.552 to 50.11                                                                   |
| Index ranges                                                 | -15 ≤ <i>h</i> ≤ 15, -17 ≤ <i>k</i> ≤ 17, -22 ≤ <i>l</i> ≤ 22                    |
| Reflections collected                                        | 61741                                                                            |
| Independent reflections                                      | 6066 [ <i>R</i> <sub>int</sub> = 0.0562, <i>R</i> <sub>sigma</sub> = 0.0263]     |
| Data/restraints/parameters                                   | 6066/1/417                                                                       |
| Goodness-of-fit on <i>F</i> <sup>2</sup>                     | 1.019                                                                            |
| Final <i>R</i> indexes [ <i>I</i> ≥ 2 $\sigma$ ( <i>I</i> )] | <i>R</i> <sub>1</sub> = 0.0276, <i>wR</i> <sub>2</sub> = 0.0692                  |
| Final <i>R</i> indexes [all data]                            | <i>R</i> <sub>1</sub> = 0.0300, <i>wR</i> <sub>2</sub> = 0.0711                  |
| Largest diff. peak/hole / e Å <sup>-3</sup>                  | 1.82/-0.99                                                                       |

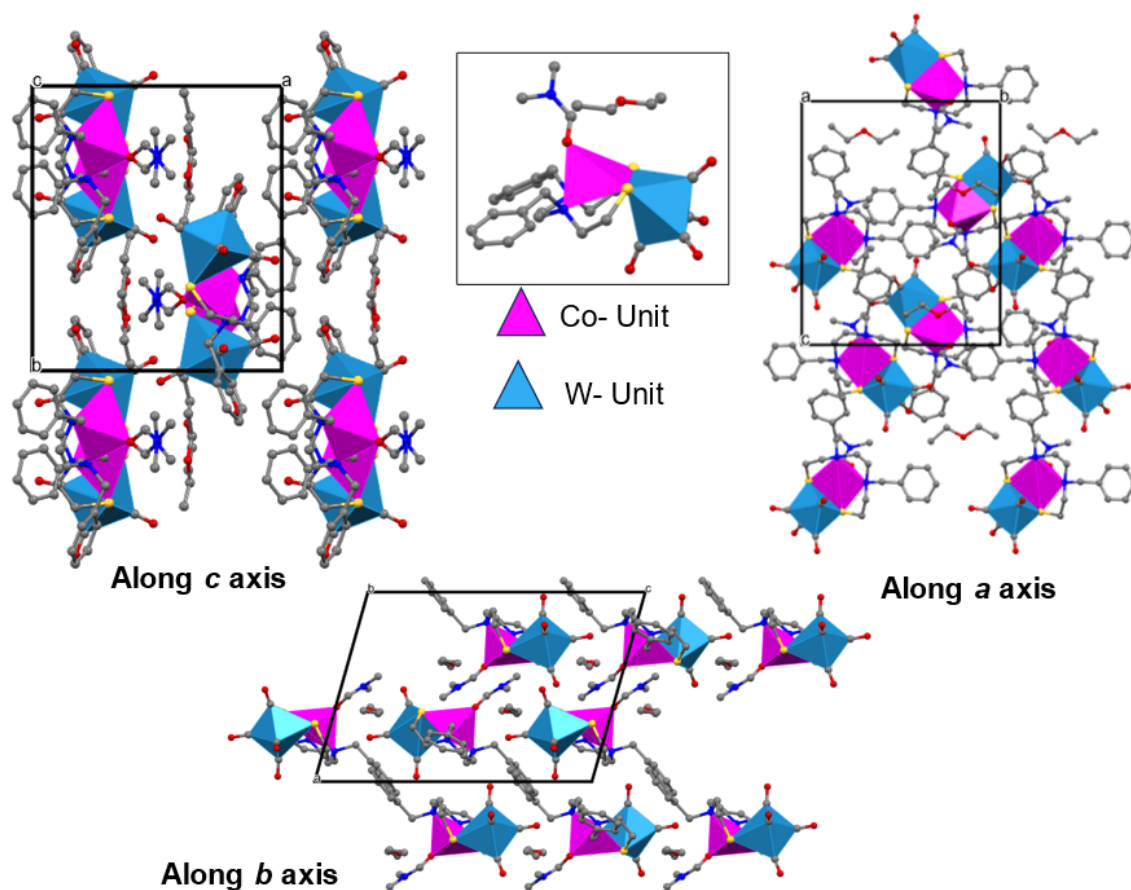

**Figure S25.** Crystal packing diagram of Complex 3 viewed along *a*, *b*, and *c* axis.

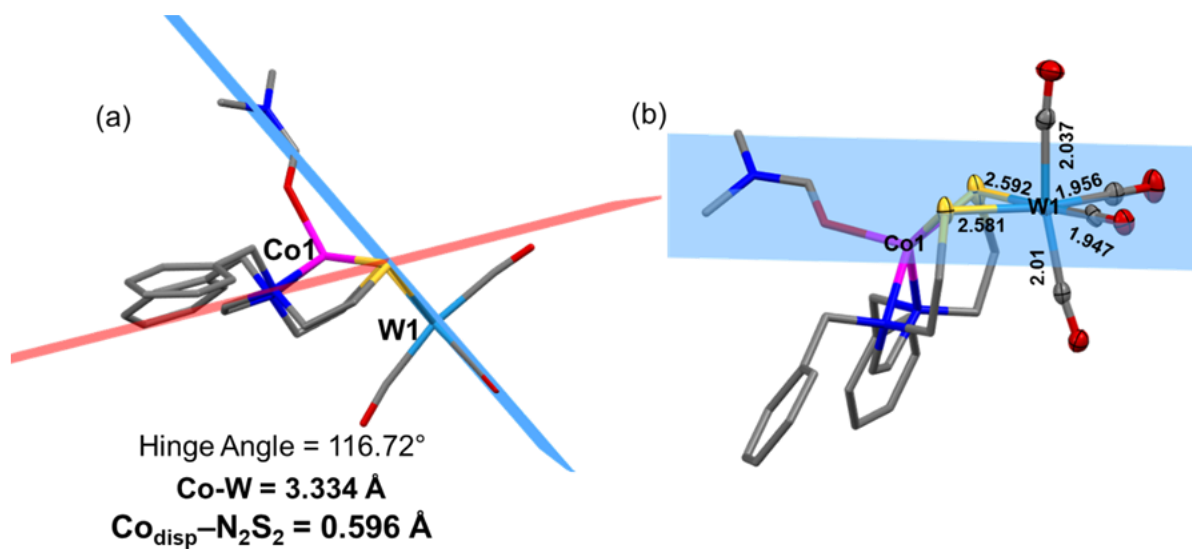

**Figure S26.** (a) Hinge Angle, displacement of Co from  $\text{N}_2\text{S}_2$  plane and the M-M distance for Complex 3. (b) Distance of the CO and the S from the W center.

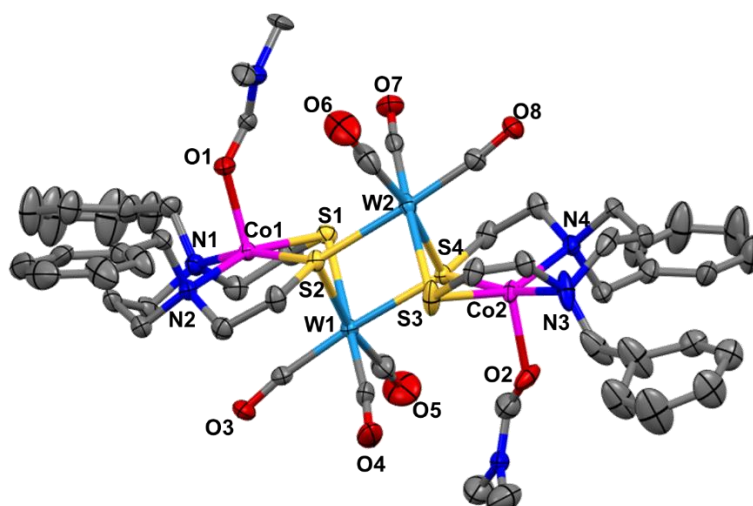

**Table S4.** Crystal data and structure refinement for Complex 4.

|                                                |                                                                   |
|------------------------------------------------|-------------------------------------------------------------------|
| CCDC Number                                    | <b>2302284</b>                                                    |
| Empirical formula                              | $C_{54}H_{70}Co_2N_6O_8S_4W_2$                                    |
| Formula weight                                 | 1544.96                                                           |
| Temperature/K                                  | 110.0                                                             |
| Crystal system                                 | monoclinic                                                        |
| Space group                                    | $P2_1/n$                                                          |
| a/Å                                            | 24.5425(16)                                                       |
| b/Å                                            | 11.5431(8)                                                        |
| c/Å                                            | 24.7944(17)                                                       |
| $\alpha/^\circ$                                | 90                                                                |
| $\beta/^\circ$                                 | 115.177(3)                                                        |
| $\gamma/^\circ$                                | 90                                                                |
| Volume/Å <sup>3</sup>                          | 6356.9(8)                                                         |
| Z                                              | 4                                                                 |
| $\rho_{\text{calc}}/\text{cm}^3$               | 1.614                                                             |
| $\mu/\text{mm}^{-1}$                           | 12.185                                                            |
| F(000)                                         | 3064.0                                                            |
| Crystal size/mm <sup>3</sup>                   | 0.3 × 0.3 × 0.2                                                   |
| Radiation                                      | CuK $\alpha$ ( $\lambda = 1.54178$ )                              |
| 2 $\Theta$ range for data collection/ $^\circ$ | 4.242 to 133.962                                                  |
| Index ranges                                   | -29 ≤ h ≤ 29, -13 ≤ k ≤ 13, -29 ≤ l ≤ 29                          |
| Reflections collected                          | 219133                                                            |
| Independent reflections                        | 11307 [ $R_{\text{int}} = 0.0919$ , $R_{\text{sigma}} = 0.0270$ ] |
| Data/restraints/parameters                     | 11307/1/704                                                       |
| Goodness-of-fit on F <sup>2</sup>              | 1.020                                                             |
| Final R indexes [ $I \geq 2\sigma(I)$ ]        | $R_1 = 0.0308$ , $wR_2 = 0.0692$                                  |
| Final R indexes [all data]                     | $R_1 = 0.0424$ , $wR_2 = 0.0747$                                  |
| Largest diff. peak/hole / e Å <sup>-3</sup>    | 1.39/-0.94                                                        |

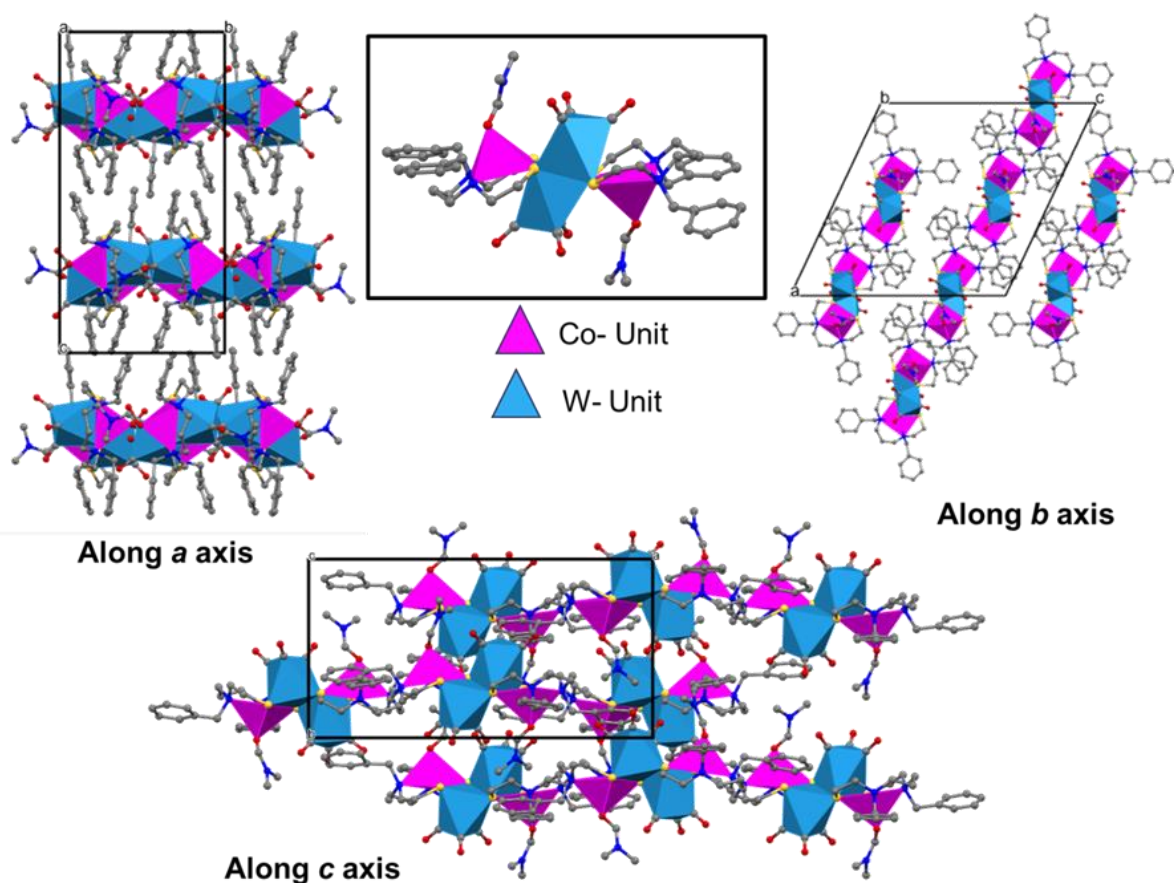

**Figure S27.** Crystal packing diagram of Complex 4 viewed along *a*, *b*, and *c* axis.

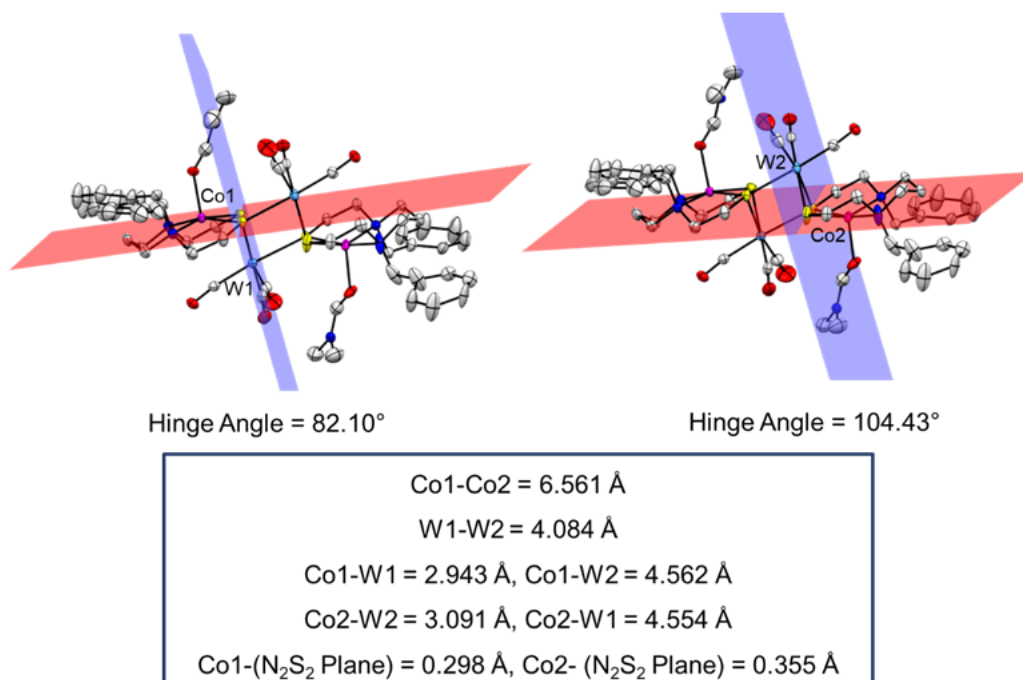

**Figure S28.** Hinge Angle, displacement of Co from N<sub>2</sub>S<sub>2</sub> plane and the M-M distances for Complex 4.

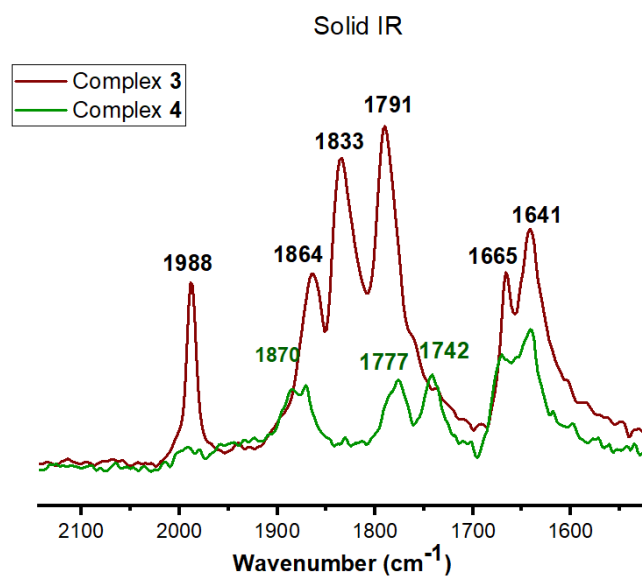

**Figure S29:** Solid IR (ATR) of complex 3 (brown) and 4 (green). The absorption band at ca.  $1641 \text{ cm}^{-1}$  is for the coordinated DMF molecule and the band at ca.  $1665 \text{ cm}^{-1}$  is for the free DMF molecule.

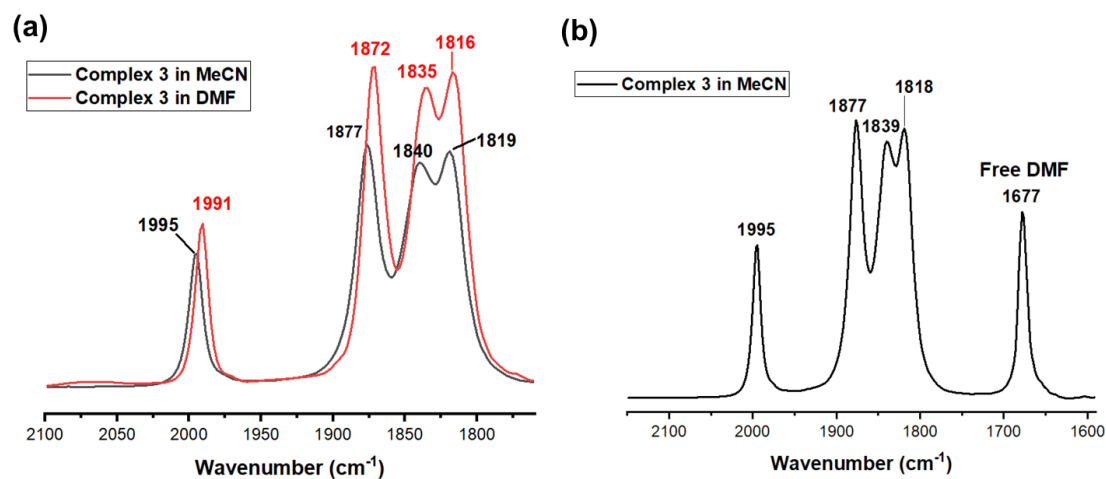

**Figure S30:** (a) IR spectrum of complex 3 in MeCN (black line) and DMF (red line) solution. (b) In MeCN, the compound loses the coordinated DMF molecule as evident from the IR spectrum (only one band at ca.  $1677 \text{ cm}^{-1}$  for the free DMF molecule).



**Table S5:** The  $\nu(\text{CO})$  absorption bands for previously reported<sup>9</sup>  $C_{2V}$  symmetric Fe, Co and Ni complexes as well as the complex **3**.

| Compound                                                                     | $\nu(\text{CO})$ ( $\text{cm}^{-1}$ ) |            |              |            |
|------------------------------------------------------------------------------|---------------------------------------|------------|--------------|------------|
|                                                                              | $\nu(A_1^1)$                          | $\nu(B_1)$ | $\nu(A_1^2)$ | $\nu(B_2)$ |
| [Co-1'(NO)]W(CO) <sub>4</sub>                                                | 1997                                  | 1878       | 1851         | 1824       |
| [Fe-1'(NO)]W(CO) <sub>4</sub>                                                | 1998                                  | 1880       | 1854         | 1827       |
| [(bme-daco)Ni]W(CO) <sub>4</sub>                                             | 1996                                  | 1873       | 1852         | 1817       |
| [((ema)Ni)W(CO) <sub>4</sub> ] <sub>2</sub> (Et <sub>4</sub> N) <sub>2</sub> | 1986                                  | 1853       | 1837         | 1791       |
| (pip) <sub>2</sub> W(CO) <sub>4</sub>                                        | 2000                                  | 1863       | 1852         | 1809       |
| Complex <b>3</b> (DMF)                                                       | 1991                                  | 1872       | 1835         | 1816       |
| Complex <b>3</b> (MeCN)                                                      | 1995                                  | 1877       | 1840         | 1819       |
| Complex <b>3</b> (ATR)                                                       | 1988                                  | 1864       | 1833         | 1791       |

**Table S6:** The  $\nu(\text{CO})$  absorption bands for previously reported pseudo  $C_{3V}$  symmetric W complexes<sup>10</sup> as well as the complex **4**.

| Compound                                                                                | $\nu(\text{CO})$ ( $\text{cm}^{-1}$ ) |                |      |
|-----------------------------------------------------------------------------------------|---------------------------------------|----------------|------|
|                                                                                         | $\nu(A_1^1)$                          | Split $\nu(E)$ |      |
| fac-[W(CO) <sub>3</sub> (dppm)(MeCN)]                                                   | 1930                                  | 1837           | 1823 |
| mer-[W(CO) <sub>3</sub> (dppm)(PPh <sub>3</sub> )]                                      | 1998                                  | 1880           | 1854 |
| mer-[W(CO) <sub>3</sub> (dppm)(Ph <sub>2</sub> PCH <sub>2</sub> -P(O)Ph <sub>2</sub> )] | 1996                                  | 1873           | 1852 |
| Complex <b>4</b> (DMF)                                                                  | 1885                                  | 1784           | --   |
| Complex <b>4</b> (ATR)                                                                  | 1870                                  | 1777           | 1742 |

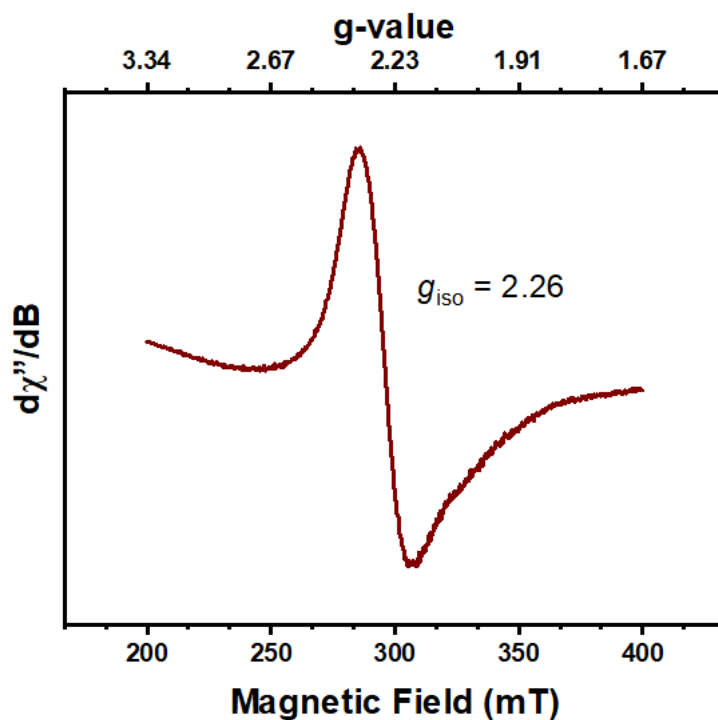

**Figure S31:** X-band EPR spectrum of Sample 3 in frozen  $\text{CH}_3\text{CN}$  solution at 6 K (Microwave frequency 9.353 GHz). 1 G modulation amplitude; 100 kHz modulation frequency; 39.06 ms conversion time; 6.325 mW microwave power.

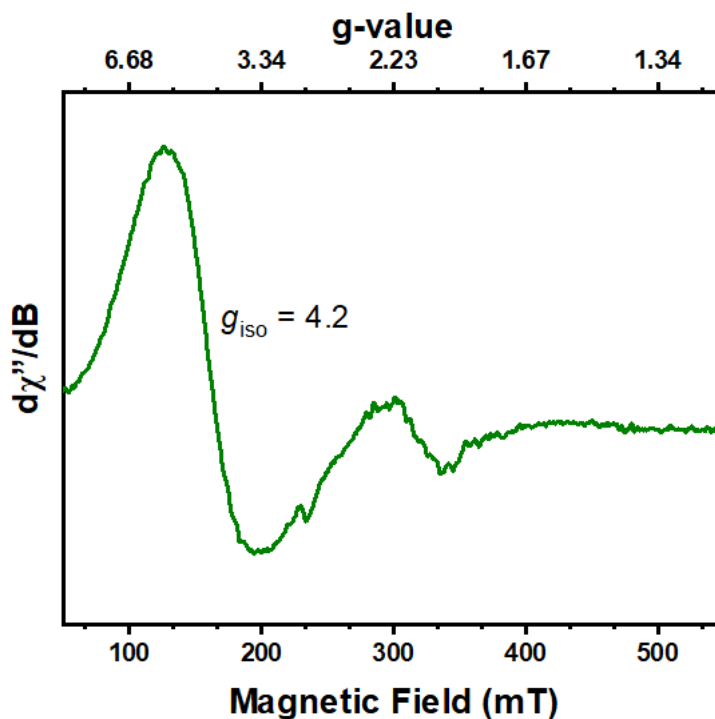

**Figure S32:** X-band EPR spectrum of Sample 4 in frozen  $\text{DMF}$  solution at 6 K (Microwave frequency 9.353 GHz). 1 G modulation amplitude; 100 kHz modulation frequency; 39.06 ms conversion time; 6.325 mW microwave power.

## Theoretical Computations

**Computational methodology.** Density functional theory (DFT) calculations were performed in Gaussian 16 Revision B.01<sup>11</sup> with the TPSSSTPSS<sup>12</sup> functional. Triple- $\zeta$  basis set 6-311++ G(d,p) basis set for Complex 1-3.<sup>12,13</sup> TPSSSTPSS functional and 6-31G basis set was used for Complex 4. For simplicity of calculation the benzyl groups in complex 4 was replaced with methyl groups. For tungsten an Effective Core Potential (ECP) and a triple- $\zeta$  quality basis set (ccpVTZ-PP VTZ-PP) was used for core and valence electrons, respectively.<sup>14</sup> The crystal structure of all the complexes were imported to use as the starting coordinates for gas phase optimization and frequency calculations using GaussView 6.0.16.<sup>15</sup> For calculation of hypothetical tetrahedral complex 1, the coordinates of tetrahedral Zn crystal structure were used as starting point for geometry optimization. The crystal structure of complex 1 was modified by methylene groups between N-to-N connector and was used as starting point for geometry optimization of hypothetical dimeric complex 2. All species were confirmed to be minimum energy structures by the absence of imaginary frequencies.

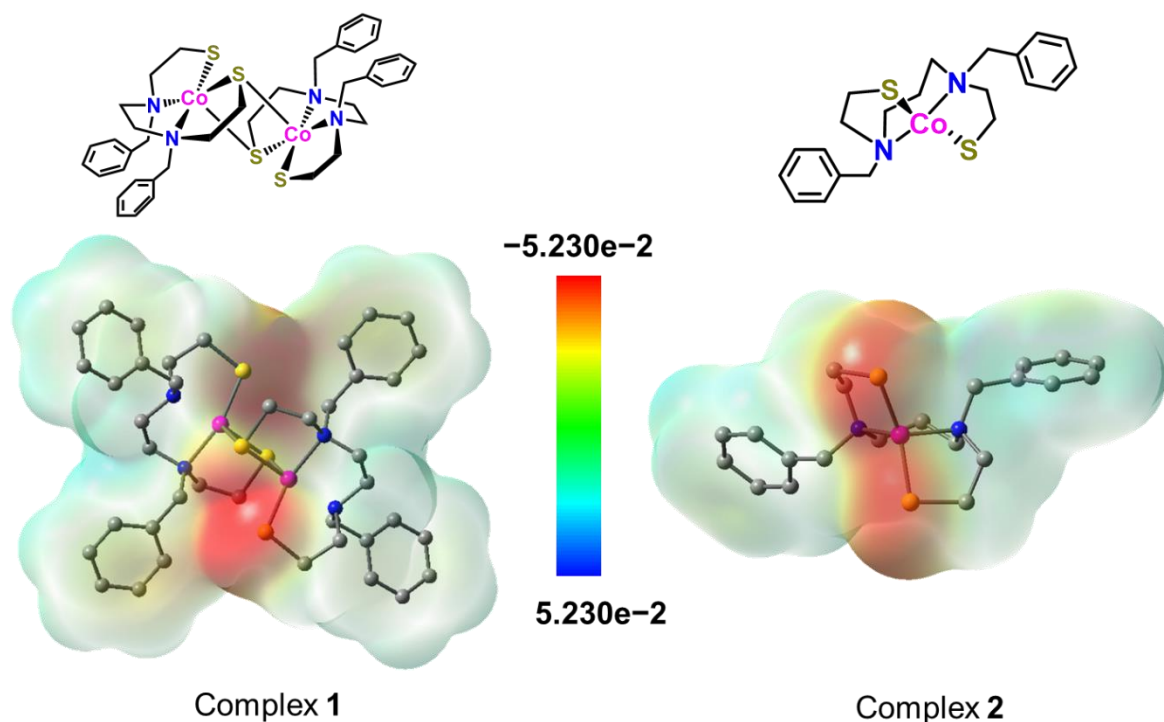

**Figure S33.** ESP map for Complex 1 (left) and Complex 2 (right) calculated using TPSSSTPSS functional and 6-311++G(d,p) basis set (in gas phase).

### Comparison between spin states for hypothetical tetrahedral structure of Complex 1

The hypothetical tetrahedral structure for complex 1 shows quartet as the ground state. The energy difference ( $E_e$ ) between the quartet and doublet spin state is found to be 10.05 kcal/mol in favour of the quartet ground state in smd model (solvent = *N,N'*-Dimethylformamide). Also, the doublet spin state displays a much larger  $\angle$ S-Co-S angle of ca.  $149^\circ$ .

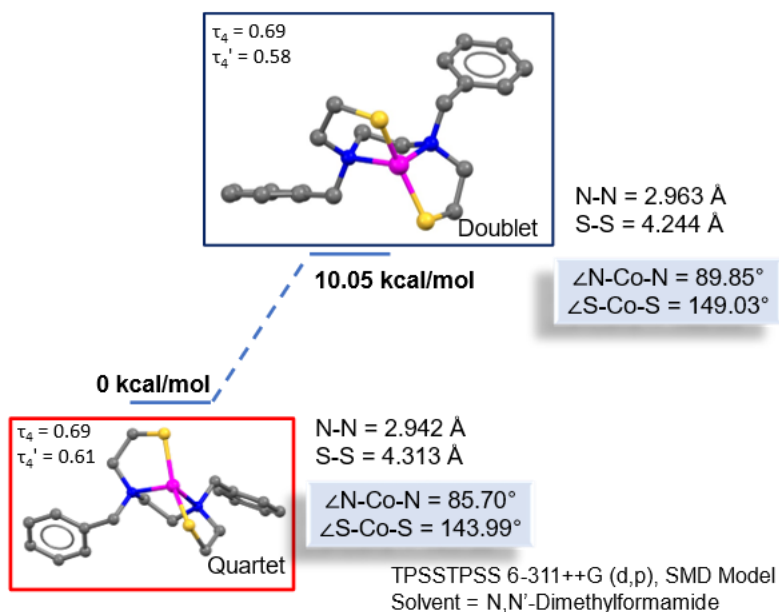

**Figure S34:** Electronic energy difference (as obtained from DFT) between doublet and quartet spin states for hypothetical tetrahedral structure of complex **1**.

### Comparison between spin states for tetrahedral structure of Complex 2

The tetrahedral structure for complex **2** shows quartet spin state as the ground state. The energy difference ( $E_e$ ) between the quartet and doublet spin state is found to be 7.2 kcal/mol in favour of the quartet ground state (in the SMD solvent model, solvent = DCM).

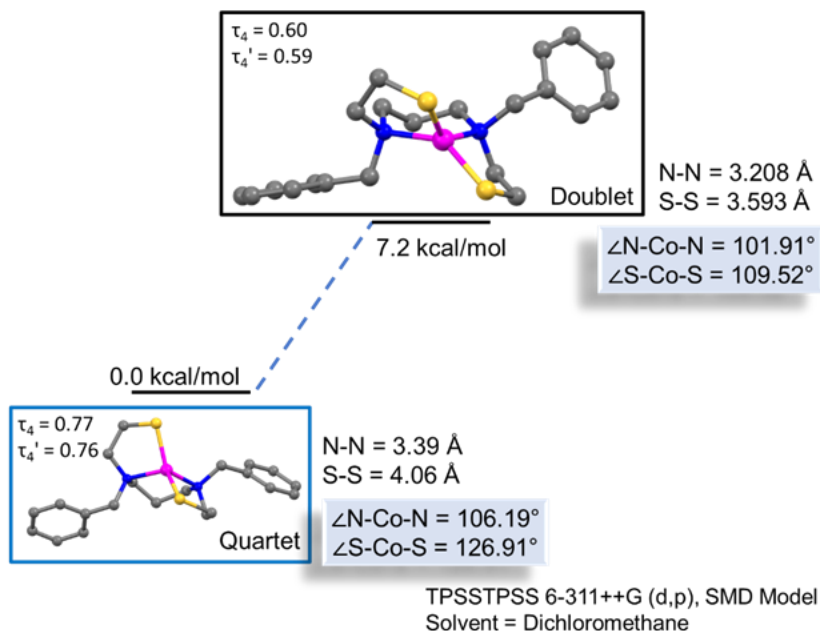

**Figure S35:** Electronic energy difference (as obtained from DFT) between doublet and quartet spin states for tetrahedral structure of complex **2**.

### DFT computation on Complex 3:

DFT optimized structure of complex **3** suggests that doublet is the ground state. The energy difference between doublet and quartet spin state is found to be 6.56 kcal/mol (in smd solvent model, solvent = *N,N'*-dimethylformamide) in favour of the doublet spin state.

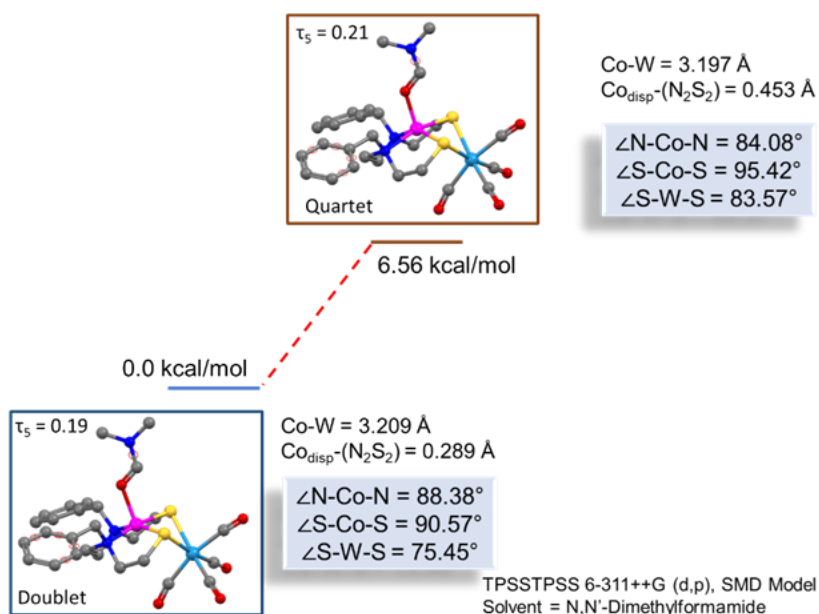

**Figure S36:** Electronic energy difference (as obtained from DFT) between doublet and quartet spin states for complex **3**.

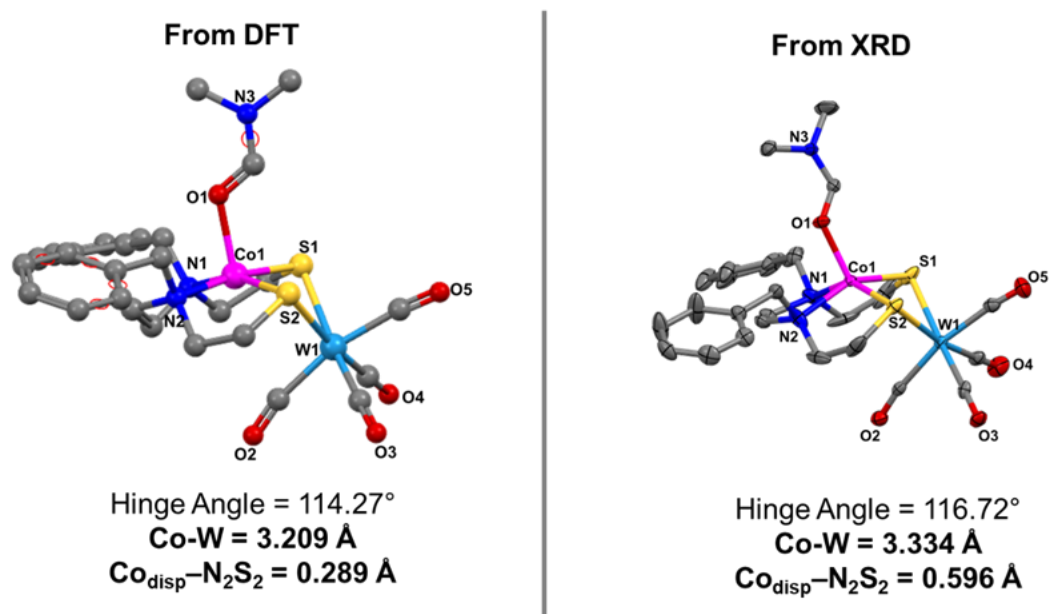

**Figure S37:** DFT optimized structure (on left) and experimentally determined X-ray structure (on right) of complex **3**.

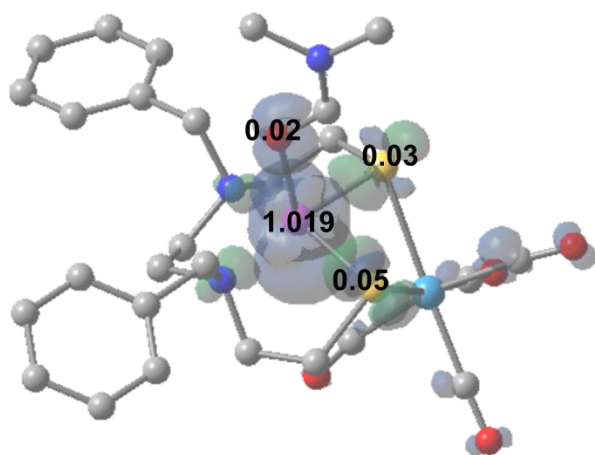

**Figure S38.** Spin density plot for complex **3**, showing most of the spins are localized on the Co center (iso value = 0.001).

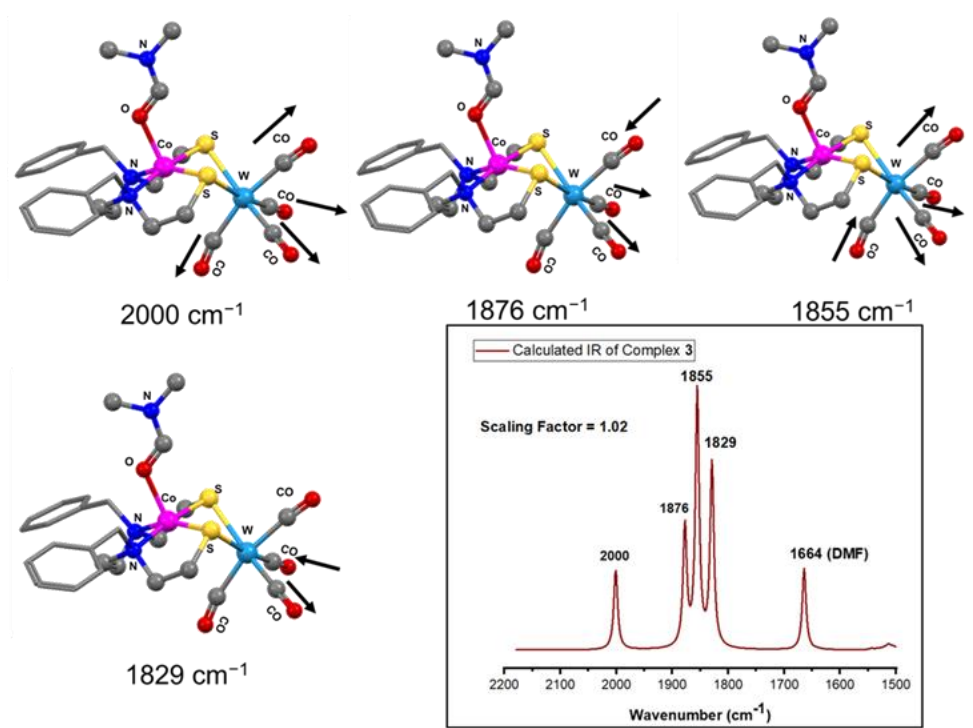

|                      | $\nu(\text{CO})$ ( $\text{cm}^{-1}$ ) |       |         |       |
|----------------------|---------------------------------------|-------|---------|-------|
| Complex <b>3</b>     | $A_1^1$                               | $B_1$ | $A_1^2$ | $B_2$ |
| Experimental (DMF)   | 1991                                  | 1872  | 1835    | 1816  |
| Experimental (Solid) | 1988                                  | 1864  | 1833    | 1791  |
| Calculated (DMF)     | 2000                                  | 1876  | 1855    | 1829  |

**Figure S39:**  $\nu(\text{CO})$  IR stretching frequency of complex **3** obtained from frequency calculation in the SMD solvent model using DMF as a solvent (Scaling factor = 1.02).

### DFT Computations on Complex 4:

The crystal structure of complex **4** was imported to use as the starting coordinates for gas phase optimization and frequency calculations using GaussView 6.0.16.<sup>15</sup> Density functional theory (DFT) calculations were performed in Gaussian 16 Revision B.01.09 with the TPSSSTPSS<sup>11</sup> functional and 6-31G basis set for Complex **4**. For simplicity of calculation the benzyl groups in complex **4** was replaced with methyl groups. For tungsten an Effective Core Potential (ECP) and a triple- $\zeta$  quality basis set (ccpVTZ-PP VTZ-PP) was used for core and valence electrons, respectively.<sup>14</sup> All species were confirmed to be minimum energy structures by the absence of imaginary frequencies.

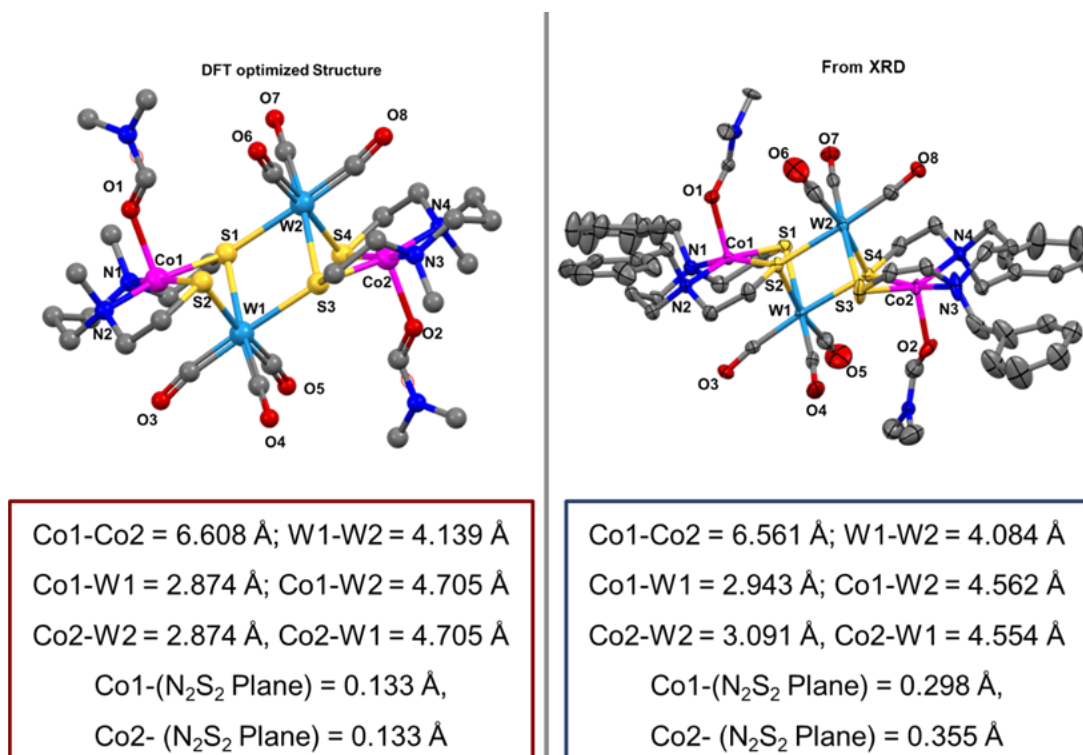

**Figure S40:** DFT optimized structure (on left) and experimentally determined X-ray structure (on right) of complex **4**.

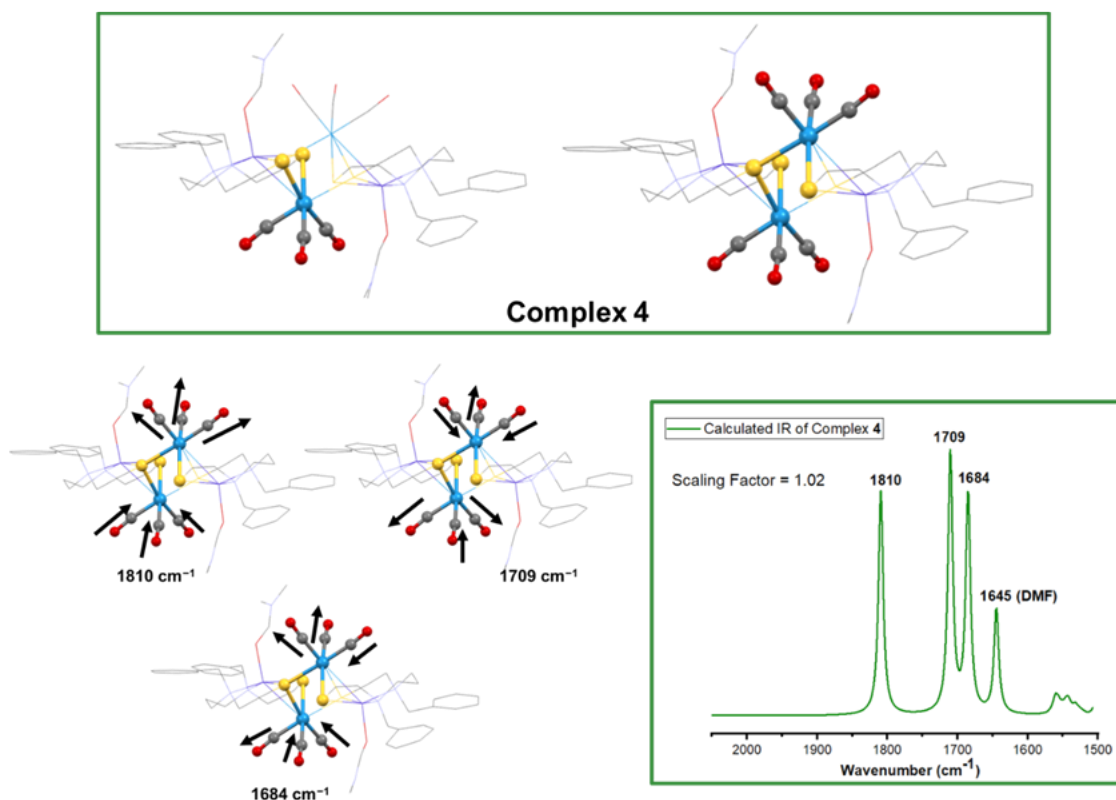

| $\nu(\text{CO})$ ( $\text{cm}^{-1}$ ) |       |         |      |
|---------------------------------------|-------|---------|------|
|                                       | $A_1$ | Split E |      |
| Experimental IR (DMF)                 | 1870  | 1784    | --   |
| Experimental IR (Solid)               | 1870  | 1777    | 1742 |
| Calculated IR                         | 1810  | 1709    | 1684 |

**Figure S41:**  $\nu(\text{CO})$  IR stretching frequency of complex 4 obtained from frequency calculation in the SMD solvent model using DMF as a solvent (Scaling factor = 1.02). The separation between the peaks (experimental) match with the calculated  $\nu(\text{CO})$  IR spectrum.



## Coordinates for Complex 1.

0 1

|    |             |             |            |
|----|-------------|-------------|------------|
| Co | 6.99550000  | 8.03810000  | 5.91450000 |
| S  | 6.38930000  | 5.82620000  | 5.04100000 |
| S  | 6.00910000  | 9.25820000  | 4.27590000 |
| N  | 8.94880000  | 7.18290000  | 6.22130000 |
| N  | 8.18350000  | 9.96040000  | 6.37800000 |
| C  | 9.95270000  | 8.28740000  | 5.95110000 |
| H  | 10.85420000 | 7.98750000  | 6.22960000 |
| H  | 9.97990000  | 8.47710000  | 4.97950000 |
| C  | 8.00140000  | 5.05990000  | 5.24080000 |
| H  | 8.02480000  | 4.56650000  | 6.09920000 |
| H  | 8.14670000  | 4.40810000  | 4.51060000 |
| C  | 9.59470000  | 9.52540000  | 6.68610000 |
| H  | 10.22330000 | 10.24900000 | 6.43390000 |
| H  | 9.68590000  | 9.36760000  | 7.65860000 |
| C  | 7.61770000  | 10.80850000 | 7.46820000 |
| H  | 7.64410000  | 10.29720000 | 8.31610000 |
| H  | 6.66720000  | 10.99880000 | 7.26350000 |
| C  | 10.38820000 | 6.13170000  | 8.06100000 |
| C  | 6.79550000  | 10.88350000 | 4.53180000 |
| H  | 6.84760000  | 11.37090000 | 3.67150000 |
| H  | 6.25600000  | 11.42300000 | 5.16200000 |
| C  | 8.19530000  | 10.68170000 | 5.09330000 |
| H  | 8.73670000  | 10.17230000 | 4.44030000 |
| H  | 8.62390000  | 11.56450000 | 5.22160000 |
| C  | 10.59690000 | 4.78320000  | 7.89510000 |
| H  | 9.94150000  | 4.25280000  | 7.45720000 |
| C  | 8.34740000  | 12.12970000 | 7.67060000 |
| C  | 9.13170000  | 6.09760000  | 5.22510000 |
| H  | 9.99180000  | 5.63930000  | 5.40480000 |
| H  | 9.18840000  | 6.49770000  | 4.32070000 |
| C  | 11.36130000 | 6.86110000  | 8.71510000 |
| H  | 11.23340000 | 7.79490000  | 8.83740000 |
| C  | 9.41720000  | 12.25100000 | 8.51140000 |
| H  | 9.71120000  | 11.48570000 | 8.99230000 |
| C  | 9.04220000  | 6.71660000  | 7.62490000 |
| H  | 8.34580000  | 6.02800000  | 7.76920000 |
| H  | 8.83110000  | 7.47930000  | 8.21890000 |
| C  | 12.49650000 | 6.28300000  | 9.18770000 |
| H  | 13.14290000 | 6.81430000  | 9.63810000 |
| C  | 11.77720000 | 4.18870000  | 8.37040000 |
| H  | 11.91520000 | 3.25870000  | 8.23810000 |
| C  | 12.72380000 | 4.91810000  | 9.01670000 |
| H  | 13.51700000 | 4.51030000  | 9.34240000 |
| C  | 10.09670000 | 13.45910000 | 8.68770000 |
| H  | 10.87170000 | 13.49970000 | 9.23460000 |
| C  | 7.91590000  | 13.24910000 | 7.01640000 |
| H  | 7.18900000  | 13.18670000 | 6.40880000 |
| C  | 9.62980000  | 14.57850000 | 8.06620000 |
| H  | 10.05330000 | 15.41850000 | 8.20280000 |
| C  | 8.52960000  | 14.47220000 | 7.22930000 |
| H  | 8.19100000  | 15.24830000 | 6.79760000 |
| Co | 5.27850000  | 5.59690000  | 7.14180000 |
| S  | 5.88470000  | 7.80880000  | 8.01530000 |
| S  | 6.26490000  | 4.37680000  | 8.78040000 |

|   |             |             |            |
|---|-------------|-------------|------------|
| N | 3.32520000  | 6.45210000  | 6.83500000 |
| N | 4.09050000  | 3.67460000  | 6.67830000 |
| C | 2.32130000  | 5.34760000  | 7.10520000 |
| H | 1.41980000  | 5.64750000  | 6.82670000 |
| H | 2.29400000  | 5.15790000  | 8.07680000 |
| C | 4.27260000  | 8.57510000  | 7.81550000 |
| H | 4.24920000  | 9.06850000  | 6.95710000 |
| H | 4.12730000  | 9.22690000  | 8.54570000 |
| C | 2.67930000  | 4.10960000  | 6.37020000 |
| H | 2.05070000  | 3.38600000  | 6.62240000 |
| H | 2.58800000  | 4.26740000  | 5.39770000 |
| C | 4.65620000  | 2.82650000  | 5.58810000 |
| H | 4.62990000  | 3.33780000  | 4.74020000 |
| H | 5.60670000  | 2.63620000  | 5.79270000 |
| C | 1.88580000  | 7.50330000  | 4.99530000 |
| C | 5.47850000  | 2.75150000  | 8.52440000 |
| H | 5.42640000  | 2.26410000  | 9.38480000 |
| H | 6.01790000  | 2.21200000  | 7.89430000 |
| C | 4.07860000  | 2.95330000  | 7.96300000 |
| H | 3.53730000  | 3.46270000  | 8.61600000 |
| H | 3.65010000  | 2.07050000  | 7.83460000 |
| C | 1.67710000  | 8.85180000  | 5.16110000 |
| H | 2.33250000  | 9.38220000  | 5.59910000 |
| C | 3.92660000  | 1.50530000  | 5.38570000 |
| C | 3.14230000  | 7.53740000  | 7.83120000 |
| H | 2.28220000  | 7.99570000  | 7.65140000 |
| H | 3.08560000  | 7.13730000  | 8.73550000 |
| C | 0.91260000  | 6.77390000  | 4.34120000 |
| H | 1.04050000  | 5.84010000  | 4.21890000 |
| C | 2.85680000  | 1.38400000  | 4.54490000 |
| H | 2.56280000  | 2.14930000  | 4.06400000 |
| C | 3.23180000  | 6.91840000  | 5.43140000 |
| H | 3.92820000  | 7.60700000  | 5.28710000 |
| H | 3.44290000  | 6.15570000  | 4.83740000 |
| C | -0.22250000 | 7.35200000  | 3.86860000 |
| H | -0.86890000 | 6.82070000  | 3.41810000 |
| C | 0.49680000  | 9.44630000  | 4.68590000 |
| H | 0.35880000  | 10.37630000 | 4.81820000 |
| C | -0.44980000 | 8.71690000  | 4.03960000 |
| H | -1.24300000 | 9.12470000  | 3.71380000 |
| C | 2.17720000  | 0.17590000  | 4.36860000 |
| H | 1.40230000  | 0.13530000  | 3.82170000 |
| C | 4.35810000  | 0.38590000  | 6.03980000 |
| H | 5.08490000  | 0.44830000  | 6.64750000 |
| C | 2.64420000  | -0.94350000 | 4.99010000 |
| H | 2.22070000  | -1.78350000 | 4.85350000 |
| C | 3.74440000  | -0.83720000 | 5.82700000 |
| H | 4.08300000  | -1.61330000 | 6.25870000 |

Coordinates for hypothetical tetrahedral structure of Complex **1**.

0 4

|   |            |             |            |
|---|------------|-------------|------------|
| S | 5.42090000 | -1.72720000 | 6.12770000 |
| N | 7.81260000 | 0.33950000  | 6.39080000 |
| C | 7.46100000 | -0.48290000 | 7.57920000 |
| H | 6.78660000 | -0.00030000 | 8.12000000 |
| H | 8.26800000 | -0.60570000 | 8.13940000 |
| C | 9.01060000 | 2.11920000  | 7.75910000 |

|    |             |             |             |
|----|-------------|-------------|-------------|
| C  | 6.90790000  | -1.84860000 | 7.19370000  |
| H  | 6.67690000  | -2.34860000 | 8.01640000  |
| H  | 7.60870000  | -2.35860000 | 6.71540000  |
| C  | 9.02230000  | -0.18700000 | 5.70740000  |
| H  | 9.04900000  | -1.17250000 | 5.79770000  |
| H  | 9.83230000  | 0.18250000  | 6.14040000  |
| C  | 7.93720000  | 1.79170000  | 6.74400000  |
| H  | 7.06650000  | 2.10450000  | 7.09630000  |
| H  | 8.12310000  | 2.30090000  | 5.91550000  |
| C  | 10.29740000 | 2.46810000  | 7.34950000  |
| H  | 10.49350000 | 2.51340000  | 6.42100000  |
| C  | 8.74490000  | 2.09140000  | 9.13320000  |
| H  | 7.86890000  | 1.88460000  | 9.43730000  |
| C  | 11.02090000 | 2.68880000  | 9.63210000  |
| H  | 11.70430000 | 2.86990000  | 10.26670000 |
| C  | 11.29900000 | 2.75100000  | 8.27080000  |
| H  | 12.16970000 | 2.98570000  | 7.97190000  |
| C  | 9.74640000  | 2.36250000  | 10.05910000 |
| H  | 9.55440000  | 2.32340000  | 10.98870000 |
| S  | 5.42090000  | 1.72720000  | 3.80860000  |
| N  | 7.81260000  | -0.33950000 | 3.54550000  |
| C  | 7.46100000  | 0.48290000  | 2.35710000  |
| H  | 6.78660000  | 0.00030000  | 1.81630000  |
| H  | 8.26800000  | 0.60570000  | 1.79690000  |
| C  | 9.01060000  | -2.11920000 | 2.17720000  |
| C  | 6.90790000  | 1.84860000  | 2.74260000  |
| H  | 6.67690000  | 2.34860000  | 1.91990000  |
| H  | 7.60870000  | 2.35860000  | 3.22090000  |
| C  | 9.02230000  | 0.18700000  | 4.22890000  |
| H  | 9.04900000  | 1.17250000  | 4.13860000  |
| H  | 9.83230000  | -0.18250000 | 3.79590000  |
| C  | 7.93720000  | -1.79170000 | 3.19230000  |
| H  | 7.06650000  | -2.10450000 | 2.84000000  |
| H  | 8.12310000  | -2.30090000 | 4.02080000  |
| C  | 10.29740000 | -2.46810000 | 2.58680000  |
| H  | 10.49350000 | -2.51340000 | 3.51530000  |
| C  | 8.74490000  | -2.09140000 | 0.80310000  |
| H  | 7.86890000  | -1.88460000 | 0.49900000  |
| C  | 11.02090000 | -2.68880000 | 0.30420000  |
| H  | 11.70430000 | -2.86990000 | -0.33040000 |
| C  | 11.29900000 | -2.75100000 | 1.66550000  |
| H  | 12.16970000 | -2.98570000 | 1.96440000  |
| C  | 9.74640000  | -2.36250000 | -0.12280000 |
| H  | 9.55440000  | -2.32340000 | -1.05240000 |
| Co | 6.24280000  | 0.00000000  | 4.96820000  |

#### Coordinates for Complex 2.

0 4

|    |            |             |             |
|----|------------|-------------|-------------|
| Co | 7.31610000 | 10.34590000 | 8.89510000  |
| S  | 9.54280000 | 10.22580000 | 9.13320000  |
| S  | 6.15730000 | 10.28670000 | 6.96740000  |
| N  | 6.31640000 | 12.06860000 | 9.54390000  |
| N  | 7.01070000 | 8.95650000  | 10.43500000 |
| C  | 6.68620000 | 14.60400000 | 9.45940000  |
| C  | 7.21420000 | 13.21040000 | 9.16710000  |
| H  | 7.40410000 | 13.14820000 | 8.19750000  |
| H  | 8.07430000 | 13.09870000 | 9.64440000  |

|   |             |             |             |
|---|-------------|-------------|-------------|
| C | 5.84480000  | 17.22940000 | 9.94950000  |
| H | 5.55940000  | 18.11920000 | 10.12110000 |
| C | 5.03990000  | 12.08890000 | 8.78100000  |
| H | 4.60070000  | 12.96720000 | 8.90760000  |
| H | 4.43550000  | 11.39270000 | 9.14180000  |
| C | 5.82360000  | 15.25720000 | 8.57600000  |
| H | 5.52170000  | 14.80640000 | 7.79630000  |
| C | 5.55780000  | 7.04860000  | 11.27870000 |
| C | 5.40130000  | 16.55840000 | 8.82310000  |
| H | 4.80760000  | 16.98760000 | 8.21810000  |
| C | 7.12800000  | 15.28790000 | 10.58300000 |
| H | 7.72110000  | 14.86310000 | 11.19150000 |
| C | 6.78190000  | 9.74610000  | 11.67540000 |
| H | 7.61890000  | 10.22530000 | 11.89840000 |
| H | 6.59480000  | 9.11590000  | 12.41560000 |
| C | 5.24750000  | 11.84580000 | 7.29230000  |
| H | 5.75350000  | 12.60420000 | 6.90640000  |
| H | 4.36630000  | 11.80800000 | 6.84290000  |
| C | 5.86360000  | 8.01340000  | 10.15560000 |
| H | 6.07310000  | 7.49310000  | 9.33990000  |
| H | 5.05210000  | 8.54880000  | 9.96870000  |
| C | 6.70760000  | 16.59230000 | 10.82340000 |
| H | 7.01640000  | 17.05050000 | 11.59620000 |
| C | 6.27660000  | 5.85620000  | 11.40140000 |
| H | 6.91750000  | 5.61820000  | 10.74190000 |
| C | 6.03150000  | 12.11030000 | 11.00960000 |
| H | 5.29570000  | 12.75260000 | 11.17120000 |
| H | 6.83420000  | 12.45020000 | 11.47890000 |
| C | 8.28070000  | 8.17900000  | 10.55420000 |
| H | 8.32030000  | 7.51980000  | 9.81660000  |
| H | 8.26610000  | 7.67510000  | 11.40620000 |
| C | 5.64640000  | 10.76550000 | 11.61360000 |
| H | 4.90530000  | 10.38100000 | 11.08140000 |
| H | 5.30770000  | 10.91710000 | 12.53140000 |
| C | 9.53780000  | 9.03260000  | 10.51380000 |
| H | 10.32690000 | 8.44050000  | 10.43080000 |
| H | 9.61920000  | 9.52710000  | 11.36750000 |
| C | 6.05500000  | 5.02160000  | 12.48400000 |
| H | 6.55740000  | 4.21960000  | 12.56810000 |
| C | 4.58720000  | 7.34370000  | 12.22950000 |
| H | 4.06930000  | 8.13540000  | 12.14290000 |
| C | 5.10980000  | 5.34080000  | 13.44620000 |
| H | 4.97490000  | 4.77190000  | 14.19510000 |
| C | 4.36770000  | 6.49370000  | 13.30360000 |
| H | 3.70100000  | 6.70770000  | 13.94560000 |

#### Coordinates for hypothetical dimeric Complex 2

0 1

|    |             |             |            |
|----|-------------|-------------|------------|
| Co | -1.39770000 | 0.19510000  | 0.98970000 |
| S  | 0.80000000  | -0.32290000 | 1.27140000 |
| S  | -1.25440000 | 1.42280000  | 2.83000000 |
| N  | -3.39680000 | 0.83210000  | 0.82350000 |
| N  | -1.81650000 | -2.00910000 | 1.12520000 |
| C  | -2.86440000 | 2.32680000  | 2.78090000 |
| H  | -3.55330000 | 1.93720000  | 3.54050000 |
| H  | -2.68440000 | 3.38180000  | 3.01890000 |
| C  | -4.29740000 | -1.51450000 | 1.34130000 |
| H  | -5.18280000 | -1.94510000 | 1.83040000 |

|    |             |             |             |
|----|-------------|-------------|-------------|
| H  | -4.43360000 | -1.69310000 | 0.26800000  |
| C  | -4.29760000 | -0.01880000 | 1.66980000  |
| H  | -5.32070000 | 0.38170000  | 1.59420000  |
| H  | -3.95850000 | 0.10600000  | 2.70200000  |
| C  | -3.45540000 | 2.23590000  | 1.38030000  |
| H  | -4.50130000 | 2.58540000  | 1.36540000  |
| H  | -2.86640000 | 2.85750000  | 0.69690000  |
| C  | 0.66860000  | -2.17160000 | 1.43880000  |
| H  | 0.87010000  | -2.62430000 | 0.46090000  |
| H  | 1.42870000  | -2.51540000 | 2.15150000  |
| C  | -3.89260000 | 0.86750000  | -0.61250000 |
| H  | -3.20130000 | 1.52450000  | -1.14300000 |
| H  | -3.75070000 | -0.13470000 | -1.02330000 |
| C  | -1.83510000 | -2.65530000 | -0.24390000 |
| H  | -2.62040000 | -2.15000000 | -0.81410000 |
| H  | -0.88750000 | -2.39610000 | -0.72830000 |
| C  | -0.70470000 | -2.54010000 | 1.97350000  |
| H  | -0.79820000 | -3.63470000 | 2.08440000  |
| H  | -0.83050000 | -2.08040000 | 2.95990000  |
| C  | -3.07750000 | -2.26540000 | 1.87620000  |
| H  | -2.89370000 | -1.93540000 | 2.90570000  |
| H  | -3.28320000 | -3.34810000 | 1.90640000  |
| Co | 1.39780000  | -0.19530000 | -0.98970000 |
| S  | -0.79990000 | 0.32240000  | -1.27140000 |
| S  | 1.25470000  | -1.42320000 | -2.82990000 |
| N  | 3.39710000  | -0.83200000 | -0.82340000 |
| N  | 1.81630000  | 2.00890000  | -1.12530000 |
| C  | 2.86490000  | -2.32680000 | -2.78080000 |
| H  | 3.55380000  | -1.93700000 | -3.54030000 |
| H  | 2.68520000  | -3.38180000 | -3.01880000 |
| C  | 4.29730000  | 1.51470000  | -1.34120000 |
| H  | 5.18270000  | 1.94540000  | -1.83020000 |
| H  | 4.43330000  | 1.69340000  | -0.26790000 |
| C  | 4.29770000  | 0.01900000  | -1.66970000 |
| H  | 5.32090000  | -0.38130000 | -1.59400000 |
| H  | 3.95870000  | -0.10590000 | -2.70190000 |
| C  | 3.45590000  | -2.23570000 | -1.38020000 |
| H  | 4.50180000  | -2.58510000 | -1.36520000 |
| H  | 2.86690000  | -2.85750000 | -0.69680000 |
| C  | -0.66880000 | 2.17120000  | -1.43920000 |
| H  | -0.87050000 | 2.62400000  | -0.46140000 |
| H  | -1.42880000 | 2.51470000  | -2.15210000 |
| C  | 3.89290000  | -0.86730000 | 0.61260000  |
| H  | 3.20160000  | -1.52440000 | 1.14310000  |
| H  | 3.75070000  | 0.13480000  | 1.02340000  |
| C  | 1.83480000  | 2.65520000  | 0.24390000  |
| H  | 2.62000000  | 2.15010000  | 0.81410000  |
| H  | 0.88710000  | 2.39590000  | 0.72820000  |
| C  | 0.70450000  | 2.53980000  | -1.97370000 |
| H  | 0.79790000  | 3.63440000  | -2.08470000 |
| H  | 0.83050000  | 2.08010000  | -2.96010000 |
| C  | 3.07740000  | 2.26540000  | -1.87620000 |
| H  | 2.89370000  | 1.93540000  | -2.90570000 |
| H  | 3.28280000  | 3.34810000  | -1.90640000 |
| C  | -2.05640000 | -4.15950000 | -0.28300000 |
| C  | -0.97060000 | -5.05210000 | -0.24200000 |
| C  | -3.35070000 | -4.70000000 | -0.38660000 |
| C  | -1.17100000 | -6.43570000 | -0.27750000 |
| H  | 0.04260000  | -4.65700000 | -0.20590000 |
| C  | -3.55780000 | -6.08270000 | -0.42400000 |

|   |             |             |             |
|---|-------------|-------------|-------------|
| H | -4.20640000 | -4.02990000 | -0.45740000 |
| C | -2.46680000 | -6.95610000 | -0.36260000 |
| H | -0.31530000 | -7.10710000 | -0.25060000 |
| H | -4.56810000 | -6.47740000 | -0.50990000 |
| H | -2.62410000 | -8.03180000 | -0.39510000 |
| C | 2.05590000  | 4.15940000  | 0.28280000  |
| C | 0.97000000  | 5.05200000  | 0.24140000  |
| C | 3.35010000  | 4.70000000  | 0.38670000  |
| C | 1.17030000  | 6.43550000  | 0.27680000  |
| H | -0.04320000 | 4.65680000  | 0.20490000  |
| C | 3.55710000  | 6.08280000  | 0.42410000  |
| H | 4.20580000  | 4.03000000  | 0.45790000  |
| C | 2.46610000  | 6.95610000  | 0.36230000  |
| H | 0.31460000  | 7.10700000  | 0.24950000  |
| H | 4.56740000  | 6.47750000  | 0.51030000  |
| H | 2.62340000  | 8.03180000  | 0.39470000  |
| C | 5.32050000  | -1.33960000 | 0.84750000  |
| C | 5.59320000  | -2.69770000 | 1.09140000  |
| C | 6.39400000  | -0.43270000 | 0.88920000  |
| C | 6.89580000  | -3.13970000 | 1.34140000  |
| H | 4.77340000  | -3.41410000 | 1.09830000  |
| C | 7.69930000  | -0.86880000 | 1.13900000  |
| H | 6.20650000  | 0.62890000  | 0.73970000  |
| C | 7.95510000  | -2.22600000 | 1.35990000  |
| H | 7.08220000  | -4.19470000 | 1.53040000  |
| H | 8.51360000  | -0.14820000 | 1.17010000  |
| H | 8.96860000  | -2.56680000 | 1.55820000  |
| C | -5.32020000 | 1.34000000  | -0.84730000 |
| C | -5.59280000 | 2.69810000  | -1.09110000 |
| C | -6.39380000 | 0.43320000  | -0.88890000 |
| C | -6.89530000 | 3.14030000  | -1.34100000 |
| H | -4.77290000 | 3.41430000  | -1.09810000 |
| C | -7.69910000 | 0.86950000  | -1.13870000 |
| H | -6.20650000 | -0.62850000 | -0.73950000 |
| C | -7.95470000 | 2.22670000  | -1.35960000 |
| H | -7.08160000 | 4.19520000  | -1.53010000 |
| H | -8.51350000 | 0.14900000  | -1.16970000 |
| H | -8.96830000 | 2.56760000  | -1.55780000 |

### Coordinates for Complex 3

0 2

|    |             |             |             |
|----|-------------|-------------|-------------|
| W  | 0.06020000  | 0.77020000  | 12.29770000 |
| Co | 1.16090000  | 2.84830000  | 9.93420000  |
| S  | 1.38000000  | 2.98800000  | 12.26080000 |
| S  | 1.22270000  | 0.51590000  | 9.99440000  |
| O  | 2.69340000  | 3.63330000  | 8.87720000  |
| O  | -2.85360000 | 1.63190000  | 11.42230000 |
| O  | -1.18660000 | 1.13070000  | 15.13350000 |
| N  | 0.08270000  | 4.72470000  | 10.10180000 |
| O  | -1.07670000 | -2.11750000 | 11.99730000 |
| N  | -0.19200000 | 2.57090000  | 8.22420000  |
| N  | 4.50400000  | 3.54610000  | 7.53940000  |
| O  | 2.51810000  | -0.54350000 | 13.82260000 |
| C  | 3.62450000  | 3.01120000  | 8.35130000  |
| H  | 3.70830000  | 2.08580000  | 8.55040000  |
| C  | 0.42570000  | 7.24910000  | 10.13580000 |
| C  | -1.74880000 | 1.38500000  | 11.67320000 |

|   |             |             |             |
|---|-------------|-------------|-------------|
| C | -0.69520000 | 1.00420000  | 14.07690000 |
| C | 1.03650000  | 5.86700000  | 10.05340000 |
| H | 1.55240000  | 5.80580000  | 9.21080000  |
| H | 1.67850000  | 5.76690000  | 10.80090000 |
| C | -0.66440000 | -1.03910000 | 12.12780000 |
| C | 0.22110000  | 7.88120000  | 11.33670000 |
| H | 0.42740000  | 7.43220000  | 12.14700000 |
| C | 0.59730000  | 2.53460000  | 6.95880000  |
| H | 1.29930000  | 1.84150000  | 7.04750000  |
| H | 1.05370000  | 3.40630000  | 6.84970000  |
| C | 0.26350000  | 4.40060000  | 12.55200000 |
| H | -0.29550000 | 4.21090000  | 13.34640000 |
| H | 0.80600000  | 5.20470000  | 12.74820000 |
| C | -0.28680000 | 9.17760000  | 11.37250000 |
| H | -0.40970000 | 9.60900000  | 12.21090000 |
| C | -0.19810000 | 2.25120000  | 5.70240000  |
| C | 4.46400000  | 4.94990000  | 7.18430000  |
| H | 3.67720000  | 5.36830000  | 7.59200000  |
| H | 4.41260000  | 5.03910000  | 6.20940000  |
| H | 5.27520000  | 5.39250000  | 7.51010000  |
| C | 1.68200000  | -0.04650000 | 13.21780000 |
| C | -0.63940000 | 4.69130000  | 11.37250000 |
| H | -1.34320000 | 3.99680000  | 11.32600000 |
| H | -1.08400000 | 5.56420000  | 11.51430000 |
| C | -0.61060000 | 9.83740000  | 10.22350000 |
| H | -0.95220000 | 10.72310000 | 10.25690000 |
| C | -0.01300000 | 0.14820000  | 8.71460000  |
| H | 0.45330000  | -0.10730000 | 7.87960000  |
| H | -0.55800000 | -0.62580000 | 9.00540000  |
| C | -0.33660000 | 0.94900000  | 5.23700000  |
| H | 0.11540000  | 0.24040000  | 5.67960000  |
| C | -0.91250000 | 1.29200000  | 8.43360000  |
| H | -1.54020000 | 1.39940000  | 9.19200000  |
| H | -1.44660000 | 1.08930000  | 7.62610000  |
| C | -0.81240000 | 3.27860000  | 4.99900000  |
| H | -0.69610000 | 4.17870000  | 5.27900000  |
| C | 0.09980000  | 7.92780000  | 8.98490000  |
| H | 0.24490000  | 7.51230000  | 8.14250000  |
| C | -1.12990000 | 0.67580000  | 4.13270000  |
| H | -1.22800000 | -0.21740000 | 3.82640000  |
| C | 5.57800000  | 2.78310000  | 6.95170000  |
| H | 5.54290000  | 1.86010000  | 7.28080000  |
| H | 6.43750000  | 3.18450000  | 7.19800000  |
| H | 5.48510000  | 2.78460000  | 5.97570000  |
| C | -0.63910000 | 4.86420000  | 8.74330000  |
| H | -1.52840000 | 5.25090000  | 8.94000000  |
| H | -0.14100000 | 5.55260000  | 8.23430000  |
| C | -0.43970000 | 9.21250000  | 9.02960000  |
| H | -0.68730000 | 9.65240000  | 8.22510000  |
| C | -1.59760000 | 2.99670000  | 3.88930000  |
| H | -2.01600000 | 3.70290000  | 3.41110000  |
| C | -1.76980000 | 1.69890000  | 3.48300000  |
| H | -2.33730000 | 1.50770000  | 2.74640000  |
| C | -0.81170000 | 4.03150000  | 8.04700000  |
| H | -0.52120000 | 4.34990000  | 7.15550000  |
| H | -1.79300000 | 3.91220000  | 7.99520000  |

## Coordinates for complex 4

0 3

|    |             |            |             |
|----|-------------|------------|-------------|
| W  | -0.76330000 | 3.30110000 | 10.81170000 |
| Co | -0.19150000 | 3.87690000 | 7.95100000  |
| S  | -2.27120000 | 4.30950000 | 8.98900000  |
| S  | -0.38280000 | 1.68020000 | 8.82300000  |
| O  | -0.89200000 | 3.71330000 | 5.98320000  |
| O  | 0.87930000  | 1.70910000 | 12.90400000 |
| O  | 1.78590000  | 5.05840000 | 10.84200000 |
| O  | -1.38040000 | 5.46790000 | 12.95420000 |
| N  | -0.08660000 | 6.10900000 | 7.80620000  |
| N  | 1.88040000  | 3.39680000 | 7.54120000  |
| C  | 1.33230000  | 6.56910000 | 7.94280000  |
| H  | 1.61370000  | 6.45610000 | 8.88600000  |
| H  | 1.37710000  | 7.53400000 | 7.72940000  |
| N  | -2.61350000 | 3.99150000 | 4.55560000  |
| C  | 1.86740000  | 2.74980000 | 6.17190000  |
| H  | 1.25390000  | 1.87350000 | 6.19730000  |
| H  | 1.47400000  | 3.43990000 | 5.45510000  |
| C  | 0.84720000  | 4.36340000 | 10.73360000 |
| C  | -0.69100000 | 6.61160000 | 6.50320000  |
| H  | -0.15440000 | 6.19440000 | 5.67680000  |
| H  | -1.71750000 | 6.31480000 | 6.44830000  |
| C  | -1.22950000 | 4.60820000 | 12.11690000 |
| C  | -0.85670000 | 6.64850000 | 8.95870000  |
| H  | -0.89090000 | 7.63530000 | 8.88620000  |
| H  | -0.37810000 | 6.42440000 | 9.79550000  |
| C  | -2.27550000 | 6.11280000 | 9.04500000  |
| H  | -2.81070000 | 6.46730000 | 8.29150000  |
| H  | -2.69390000 | 6.41750000 | 9.88940000  |
| C  | -2.07820000 | 3.61420000 | 5.69810000  |
| H  | -2.65600000 | 3.23560000 | 6.35060000  |
| C  | 2.84370000  | 4.51750000 | 7.61950000  |
| H  | 3.66450000  | 4.26990000 | 7.12320000  |
| H  | 3.09580000  | 4.65780000 | 8.56640000  |
| C  | 2.29970000  | 5.82590000 | 7.05330000  |
| H  | 3.06470000  | 6.42270000 | 6.85650000  |
| H  | 1.84750000  | 5.62990000 | 6.19470000  |
| C  | 0.24490000  | 2.27820000 | 12.09690000 |
| C  | 2.28630000  | 2.41920000 | 8.55720000  |
| H  | 2.33750000  | 2.87960000 | 9.43210000  |
| H  | 3.19610000  | 2.09720000 | 8.33680000  |
| C  | 1.37010000  | 1.21110000 | 8.70170000  |
| H  | 1.62630000  | 0.70430000 | 9.51300000  |
| H  | 1.49250000  | 0.61520000 | 7.92080000  |
| C  | -1.80800000 | 4.60180000 | 3.51160000  |
| H  | -0.88730000 | 4.70250000 | 3.82500000  |
| H  | -2.17630000 | 5.49060000 | 3.29740000  |
| H  | -1.82840000 | 4.04260000 | 2.71150000  |
| C  | -4.02760000 | 3.83730000 | 4.31870000  |
| H  | -4.16370000 | 3.26120000 | 3.53430000  |
| H  | -4.43350000 | 4.70850000 | 4.16170000  |
| H  | -4.44280000 | 3.41410000 | 5.10270000  |
| W  | -4.51340000 | 3.03250000 | 9.26610000  |
| Co | -5.08520000 | 2.45680000 | 12.12680000 |
| S  | -3.00550000 | 2.02410000 | 11.08880000 |
| S  | -4.89390000 | 4.65350000 | 11.25480000 |
| O  | -4.38470000 | 2.62030000 | 14.09460000 |
| O  | -6.15600000 | 4.62450000 | 7.17380000  |



|   |             |             |             |
|---|-------------|-------------|-------------|
| O | -7.06260000 | 1.27530000  | 9.23580000  |
| O | -3.89630000 | 0.86570000  | 7.12360000  |
| N | -5.19010000 | 0.22460000  | 12.27150000 |
| N | -7.15700000 | 2.93690000  | 12.53660000 |
| C | -6.60900000 | -0.23550000 | 12.13500000 |
| H | -6.89040000 | -0.12250000 | 11.19170000 |
| H | -6.65380000 | -1.20030000 | 12.34840000 |
| N | -2.66320000 | 2.34210000  | 15.52210000 |
| C | -7.14410000 | 3.58390000  | 13.90590000 |
| H | -6.53060000 | 4.46020000  | 13.88050000 |
| H | -6.75070000 | 2.89380000  | 14.62280000 |
| C | -6.12390000 | 1.97020000  | 9.34420000  |
| C | -4.58570000 | -0.27790000 | 13.57460000 |
| H | -5.12230000 | 0.13940000  | 14.40090000 |
| H | -3.55910000 | 0.01890000  | 13.62940000 |
| C | -4.04710000 | 1.72540000  | 7.96080000  |
| C | -4.42000000 | -0.31490000 | 11.11910000 |
| H | -4.38580000 | -1.30170000 | 11.19160000 |
| H | -4.89860000 | -0.09070000 | 10.28230000 |
| C | -3.00120000 | 0.22090000  | 11.03270000 |
| H | -2.46600000 | -0.13360000 | 11.78630000 |
| H | -2.58280000 | -0.08390000 | 10.18840000 |
| C | -3.19850000 | 2.71940000  | 14.37970000 |
| H | -2.62070000 | 3.09800000  | 13.72720000 |
| C | -8.12040000 | 1.81610000  | 12.45830000 |
| H | -8.94120000 | 2.06380000  | 12.95460000 |
| H | -8.37250000 | 1.67590000  | 11.51130000 |
| C | -7.57640000 | 0.50770000  | 13.02450000 |
| H | -8.34140000 | -0.08900000 | 13.22130000 |
| H | -7.12420000 | 0.70370000  | 13.88310000 |
| C | -5.52160000 | 4.05550000  | 7.98090000  |
| C | -7.56300000 | 3.91440000  | 11.52060000 |
| H | -7.61420000 | 3.45400000  | 10.64570000 |
| H | -8.47280000 | 4.23650000  | 11.74100000 |
| C | -6.64680000 | 5.12260000  | 11.37610000 |
| H | -6.90300000 | 5.62930000  | 10.56480000 |
| H | -6.76920000 | 5.71850000  | 12.15700000 |
| C | -3.46870000 | 1.73180000  | 16.56620000 |
| H | -4.38940000 | 1.63120000  | 16.25280000 |
| H | -3.10040000 | 0.84300000  | 16.78040000 |
| H | -3.44820000 | 2.29100000  | 17.36630000 |
| C | -1.24910000 | 2.49640000  | 15.75910000 |
| H | -1.11300000 | 3.07240000  | 16.54350000 |
| H | -0.84320000 | 1.62520000  | 15.91610000 |
| H | -0.83390000 | 2.91950000  | 14.97510000 |
| H | -0.62600000 | 7.67910000  | 6.46820000  |
| H | 2.86510000  | 2.47890000  | 5.89590000  |
| H | -4.65070000 | -1.34530000 | 13.60970000 |
| H | -8.14180000 | 3.85480000  | 14.18180000 |

## References

1. D. K. Mills, I. Font, P. J. Farmer, Y.-M. Hsiao, T. Tuntulani, R. M. Buonomo, D. C. Goodman, G. Musie, C. A. Grapperhaus, M. J. Maguire, C.-H. Lai, M. L. Hatley, J. J. Smee, J. A. Bellefeuille, M. Y. Darensbourg, R. D. Hancock, S. Eng and A. E. Martell, in *Inorganic Syntheses*, John Wiley & Sons, Ltd, 1998, pp. 89–98.
2. D. J. Darensbourg and R. L. Kump, *Inorg. Chem.*, 1978, **17**, 2680–2682.
3. Bruker (2019). *APEX3* (v2019.1-0) Bruker AXS Inc., Madison, Wisconsin, USA.
4. Sheldrick, G. M. (2016). *SADABS*. University of Göttingen, Germany.
5. Sheldrick, G., SHELXT - Integrated space-group and crystal-structure determination. *Acta Crystallographica Section A* 2015, **71**, 3-8.
6. Sheldrick, G. M., Crystal structure refinement with SHELXL. *Acta Crystallographica Section C* 2015, **71**, 3-8.
7. Dolomanov, O. V.; Bourhis, L. J.; Gildea, R. J.; Howard, J. A. K.; Puschmann, H., OLEX2: a complete structure solution, refinement and analysis program. *Journal of Applied Crystallography* 2009, **42**, 339-341.
8. C. F. Macrae, I. Sovago, S. J. Cottrell, P. T. A. Galek, P. McCabe, E. Pidcock, M. Platings, G. P. Shields, J. S. Stevens, M. Towler and P. A. Wood, *J. Appl. Cryst.*, 2020, **53**, 226-235
9. J. L. Hess, H. L. Conder, K. N. Green and M. Y. Darensbourg, *Inorg. Chem.*, 2008, **47**, 2056–2063.
10. D. J. Darensbourg, D. J. Zalewski, C. Plepys and C. Campana, *Inorg. Chem.*, 1987, **26**, 3727–3732.
11. M. J. Frisch, G. W. Trucks, H. B. Schlegel, G. E. Scuseria, M. A. Robb, J. R. Cheeseman, G. Scalmani, V. Barone, G. A. Petersson, H. Nakatsuji, X. Li, M. Caricato, A. V. Marenich, J. Bloino, B. G. Janesko, R. Gomperts, B. Mennucci, H. P. Hratchian, J. V. Ortiz, A. F. Izmaylov, J. L. Sonnenberg, Williams, F. Ding, F. Lipparini, F. Egidi, J. Goings, B. Peng, A. Petrone, T. Henderson, D. Ranasinghe, V. G. Zakrzewski, J. Gao, N. Rega, G. Zheng, W. Liang, M. Hada, M. Ehara, K. Toyota, R. Fukuda, J. Hasegawa, M. Ishida, T. Nakajima, Y. Honda, O. Kitao, H. Nakai, T. Vreven, K. Throssell, J. A. Montgomery Jr., J. E. Peralta, F. Ogliaro, M. J. Bearpark, J. J. Heyd, E. N. Brothers, K. N. Kudin, V. N. Staroverov, T. A. Keith, R. Kobayashi, J. Normand, K. Raghavachari, A. P. Rendell, J. C. Burant, S. S. Iyengar, J. Tomasi, M. Cossi, J. M. Millam, M. Klene, C. Adamo, R. Cammi, J. W. Ochterski, R. L. Martin, K. Morokuma, O. Farkas, J. B. Foresman and D. J. Fox, Gaussian Inc., Wallingford, CT, 2016.
12. J. Tao, J. P. Perdew, V. N. Staroverov and G. E. Scuseria, *Phys. Rev. Lett.*, 2003, **91**, 146401.
13. R. Krishnan, J. S. Binkley, R. Seeger and J. A. Pople, *The Journal of Chemical Physics*, 2008, **72**, 650–654.
14. K. A. Peterson, D. Figgen, M. Dolg and H. Stoll, *The Journal of Chemical Physics*, 2007, **126**, 124101.
15. R. Dennington, T. Keith, and J. Millam, Semichem Inc., Shawnee Mission, KS, 2019.
